# Supplementary material for: Synthesis, self-assembly and Langerin recognition studies of a resorcinarene-based glycocluster exposing a hyaluronic acid thiodisaccharide mimetic
Source: Royal Society of Chemistry journal article supplement (doi:10.1039/d1ob00895a), 2021-01-01

## **Synthesis, Self-assembly and Langerin Recognition Studies of a Resorcinarene-based Glycocluster Exposing a Hyaluronic Acid Thiodisaccharide Mimetic**

Alejandro E. Cristófalo,<sup>1,2</sup> Pedro M. Nieto,<sup>3\*</sup> Michel Thépaut,<sup>4</sup> Franck Fieschi,<sup>4</sup> Pablo H. Di Chenna,<sup>1,5</sup> and María Laura Uhrig<sup>\*1,2</sup>

<sup>1</sup>Departamento de Química Orgánica, Facultad de Ciencias Exactas y Naturales, Universidad de Buenos Aires, Ciudad Universitaria, Pabellón 2, C1428EGA Buenos Aires, Argentina

<sup>2</sup>CONICET-Universidad de Buenos Aires, Centro de Investigaciones en Hidratos de Carbono (CIHIDECAR), C1428EGA Buenos Aires, Argentina

<sup>3</sup>Glycosystems Laboratory, Instituto de Investigaciones Químicas (IIQ), cicCartuja, CSIC and Universidad de Sevilla, 41092 Sevilla, España

<sup>4</sup>Univ. Grenoble Alpes, CNRS, CEA, Institut de Biologie Structurale, F-38044 Grenoble, France

<sup>5</sup>CONICET-Universidad de Buenos Aires, Unidad de Microanálisis y Métodos Físicos Aplicados a la Química Orgánica (UMYMFOR), C1428EGA Buenos Aires, Argentina

\* Corresponding authors. María L. Uhrig, e-mail: [mluhrig@qo.fcen.uba.ar](mailto:mluhrig@qo.fcen.uba.ar); ORCID: <https://orcid.org/0000-0002-6980-4141>; Pedro M. Nieto, e-mail: [pedro.nieto@iiq.csic.es](mailto:pedro.nieto@iiq.csic.es), ORCID: <https://orcid.org/0000-0002-4074-9011>

## Table of contents

|                                     |                 |
|-------------------------------------|-----------------|
| Figure S1                           | Page S3         |
| Figure S2                           | Page S3         |
| Figure S3                           | Page S4         |
| Figure S4                           | Page S4         |
| Figure S5                           | Page S5         |
| Figure S6                           | Page S5         |
| Figure S7                           | Page S6         |
| Figure S8                           | Page S6         |
| Figure S9                           | Pages S7 to S8  |
| NMR spectra of compounds <b>2–6</b> | Pages S9 to S21 |

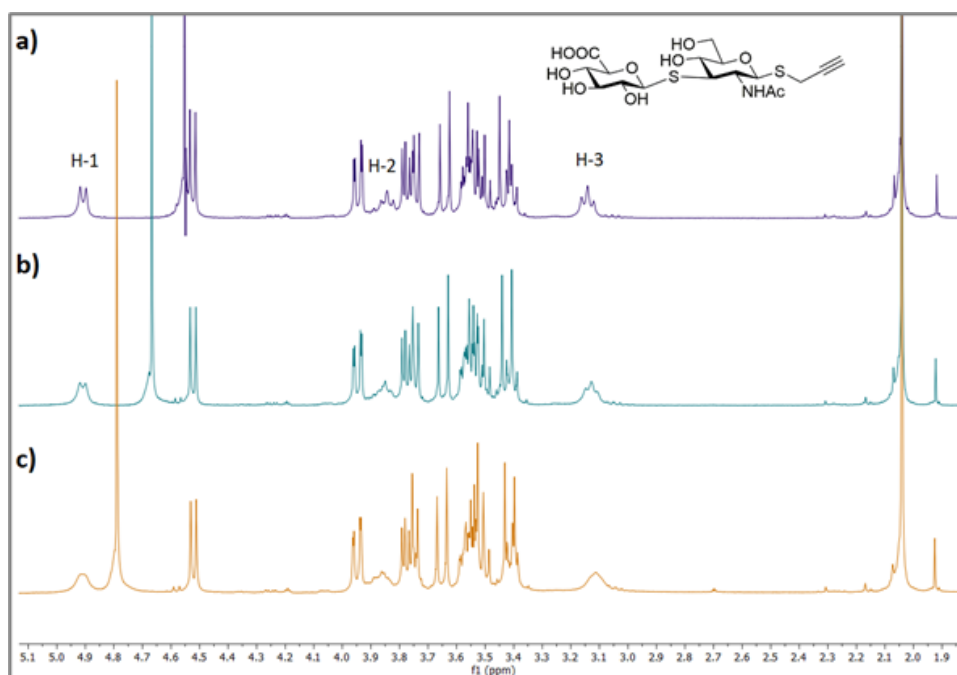

**Figure S1.**  $^1\text{H}$  NMR spectrum (500 MHz) of compound **3** in  $\text{D}_2\text{O}$  at a) 45 °C, b) 35 °C and c) 25 °C.

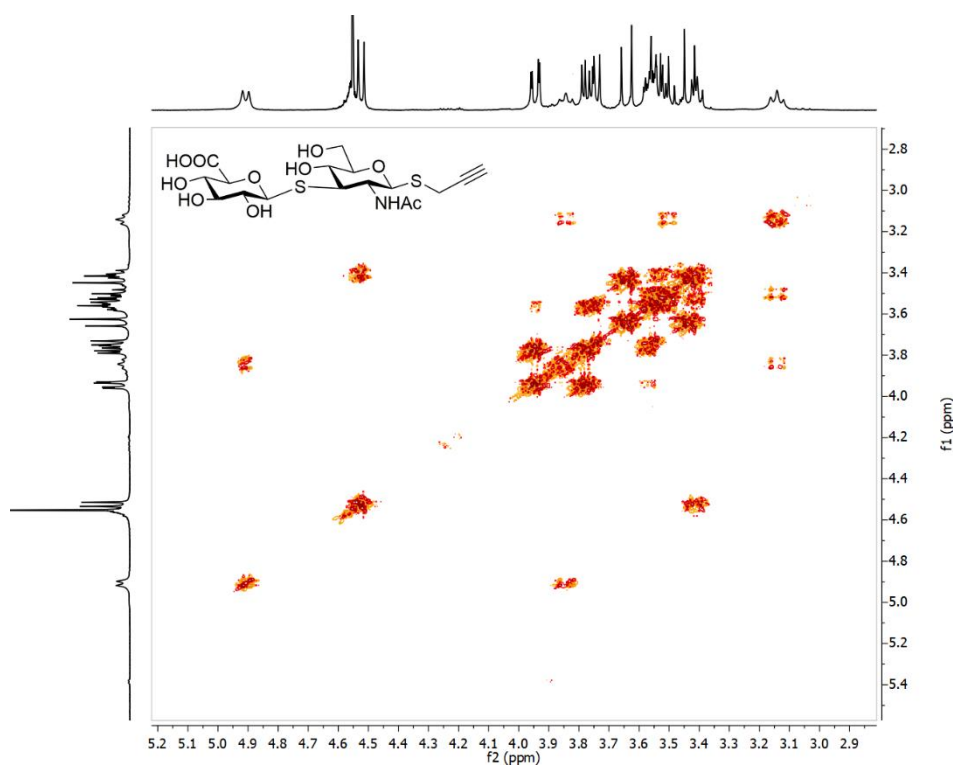

**Figure S2.**  $^1\text{H}$ - $^1\text{H}$  COSY NMR spectrum (500 MHz) of compound **3** in  $\text{D}_2\text{O}$  at 45 °C.

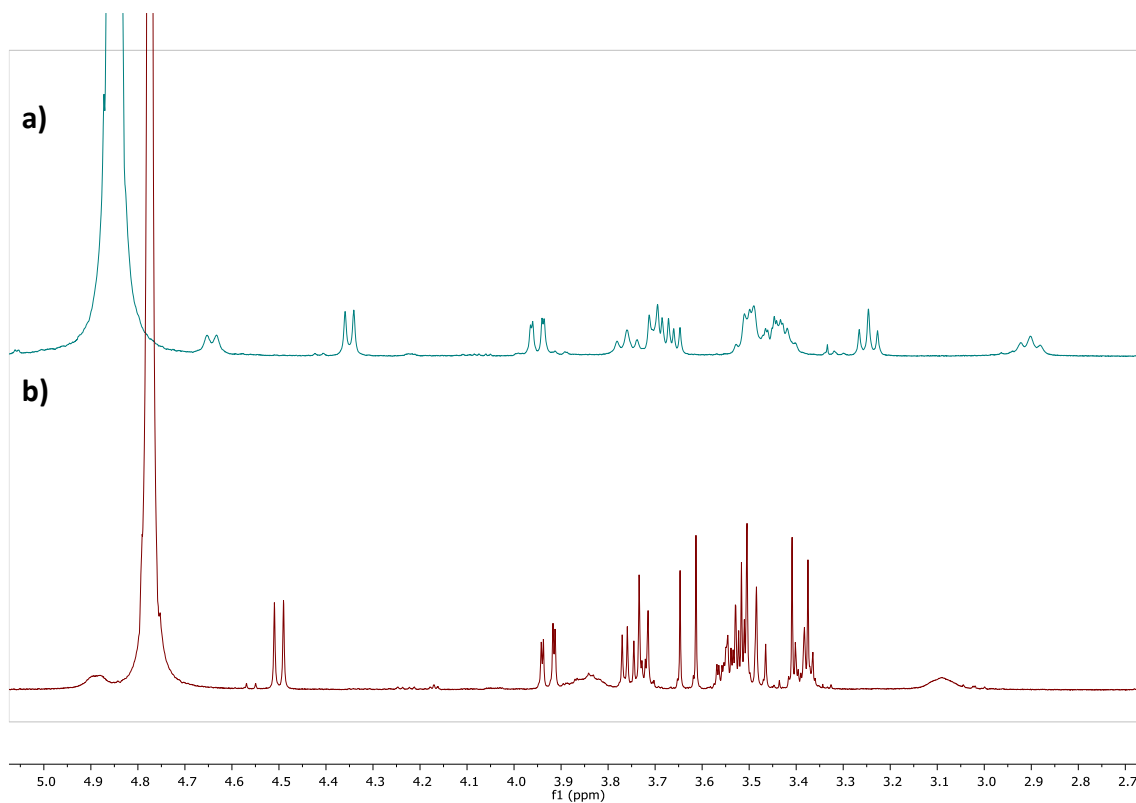

**Figure S3.**  $^1\text{H}$  NMR spectra (500 MHz) of compound **3** in  $\text{D}_2\text{O}$  at pH 12 (a) and pH 5 (b). Alkalinization of the pH 5 sample was performed adding to the NMR tube NaOD (10%) in  $\text{D}_2\text{O}$ .

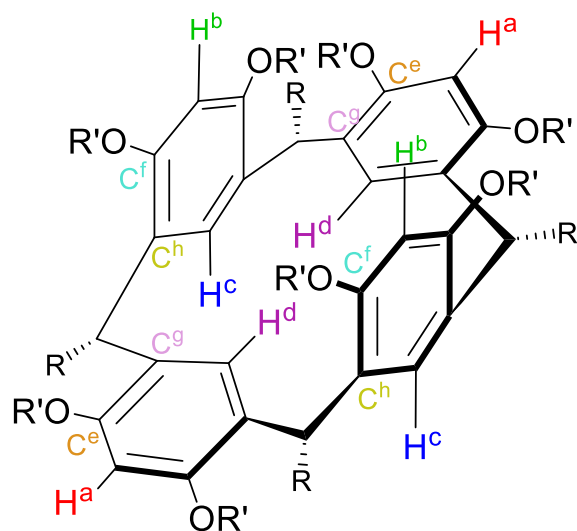

**Figure S4.** Schematic representation of the resorcinarene aromatic core in its *flattened boat* conformation with  $C_{2v}$  symmetry.

**Acquisition Parameter**

|             |            |                       |           |                  |           |
|-------------|------------|-----------------------|-----------|------------------|-----------|
| Source Type | ESI        | Ion Polarity          | Positive  | Set Nebulizer    | 2.7 Bar   |
| Focus       | Not active | Set Capillary         | 4500 V    | Set Dry Heater   | 200 °C    |
| Scan Begin  | 100 m/z    | Set End Plate Offset  | -500 V    | Set Dry Gas      | 6.0 l/min |
| Scan End    | 2700 m/z   | Set Collision Cell RF | 600.0 Vpp | Set Divert Valve | Source    |

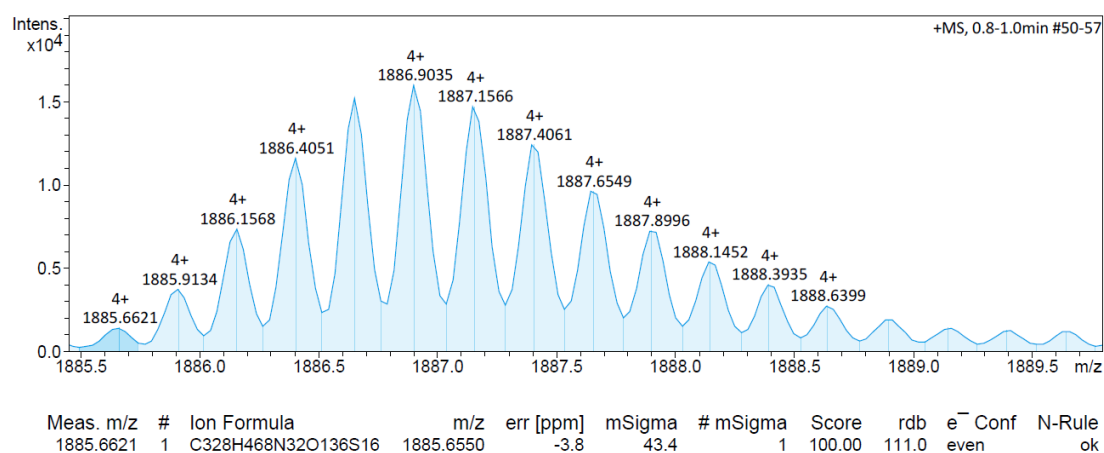

**Figure S5.** ESI-HRMS spectrum of compound 5.

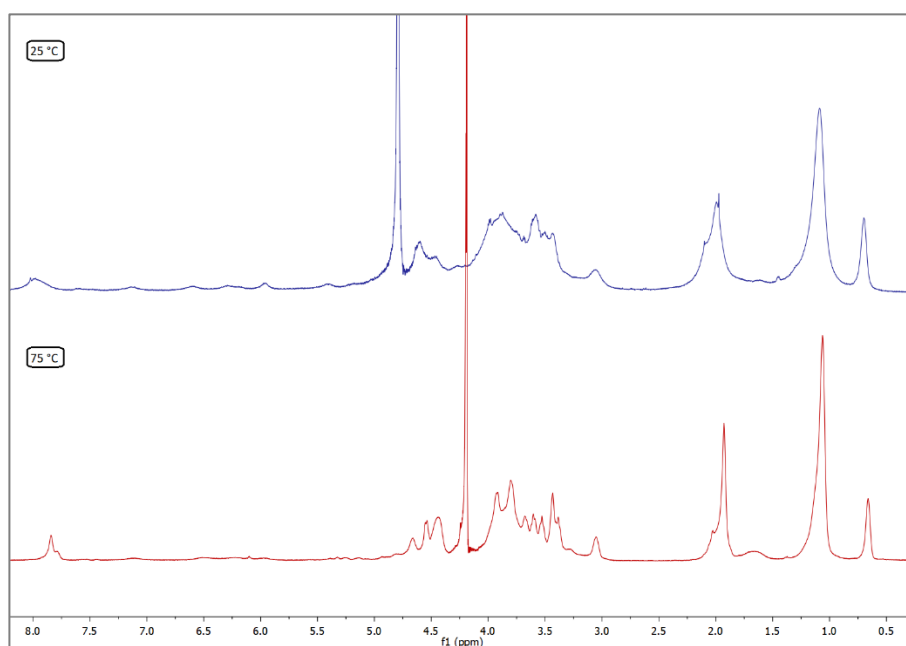

**Figure S6.** <sup>1</sup>H NMR spectra of compound 6 (500 MHz) in D<sub>2</sub>O at 25 °C (up) and 75 °C (down).

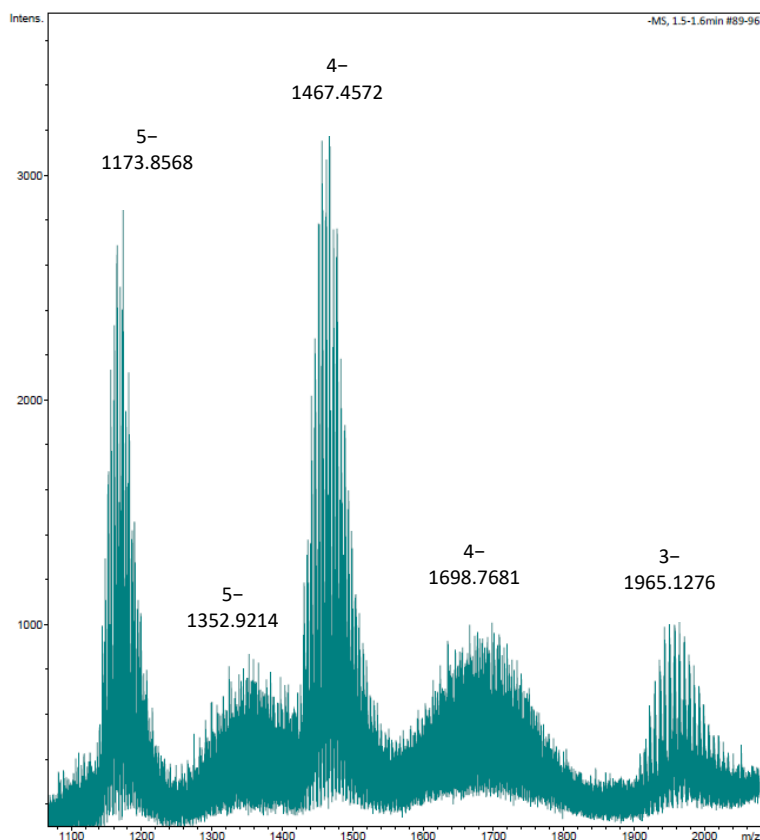

**Figure S7.** ESI-HRMS spectrum of compound **6**.

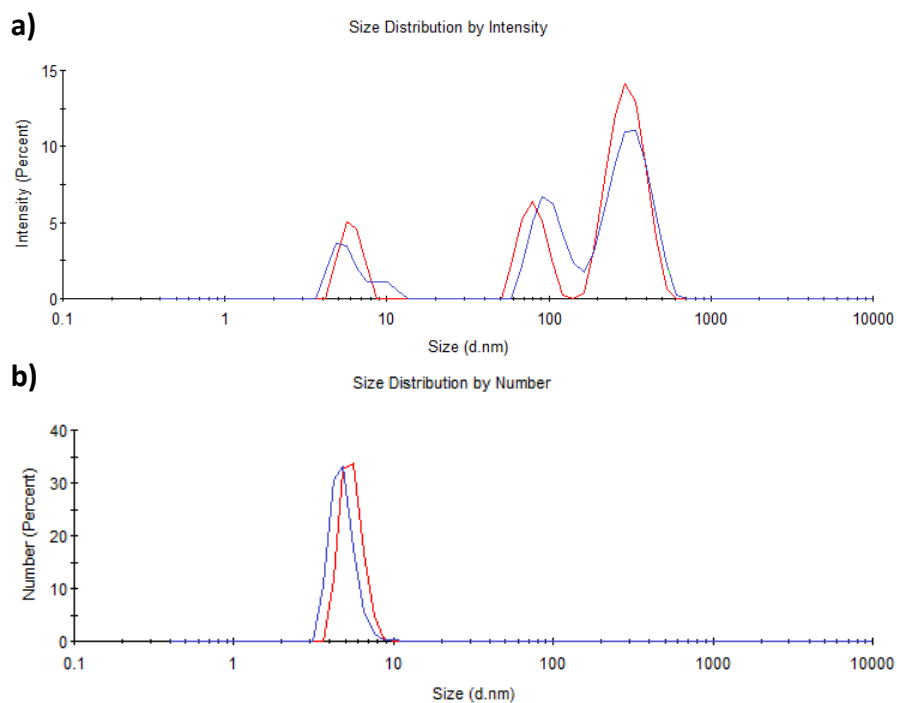

**Figure S8.** Dynamic light scattering analysis of glycoresorcinarene **6** in water. Particle size distribution by a) intensity and b) number.

a)

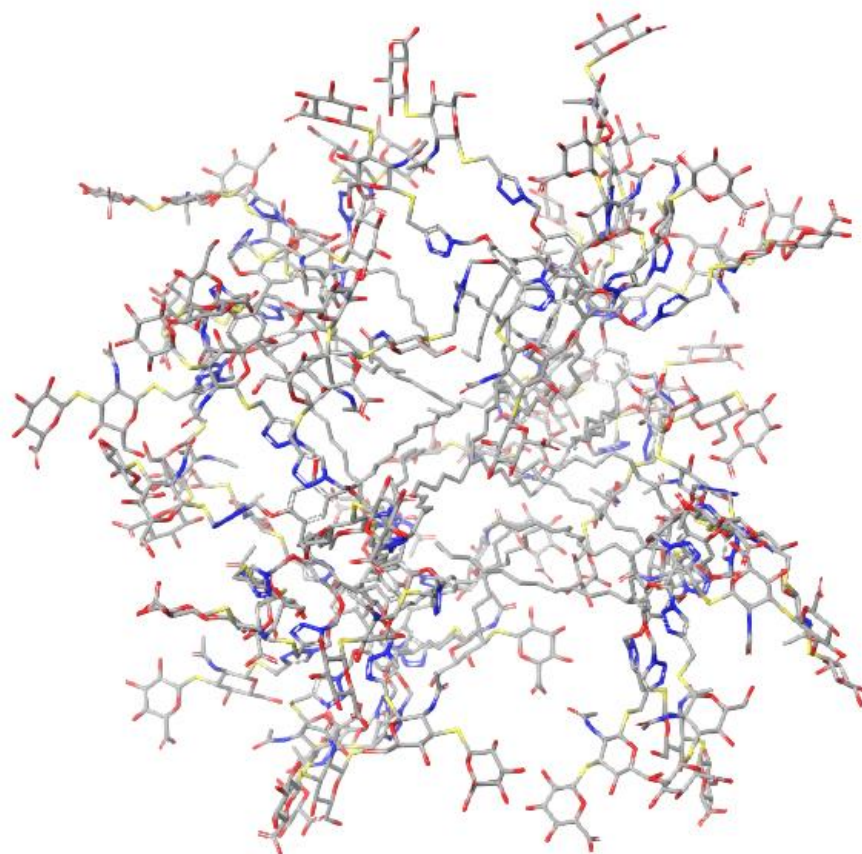

b)

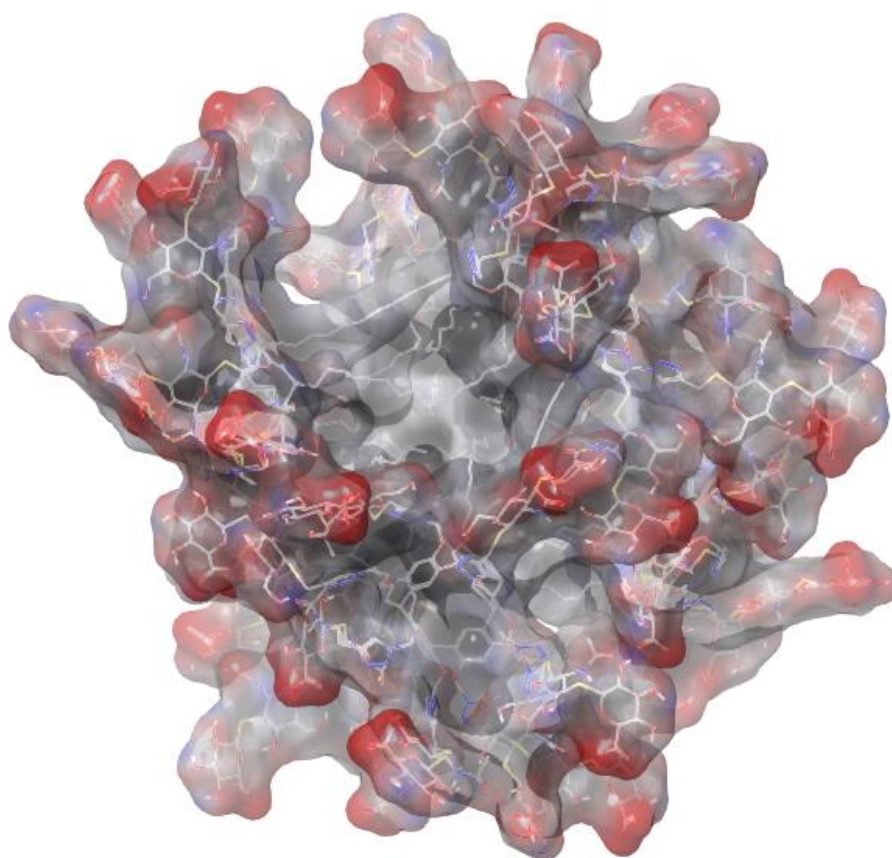

c)

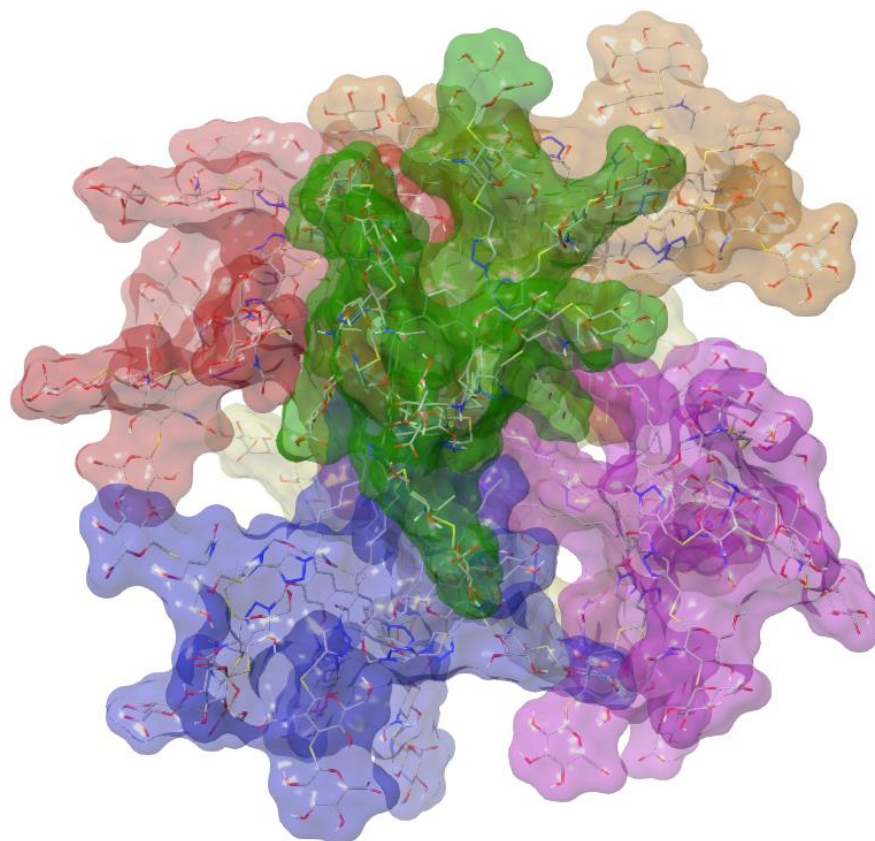

**Figure S9.** Proposed hexameric assembly of glycoresorcinarene **6**. a) All-atom structure of the micelle obtained by MM and restrained MD simulations, b) Surface of the micelle mapping electrostatic potential, c) Surface of the hexamer with monomers distinguished by colour.



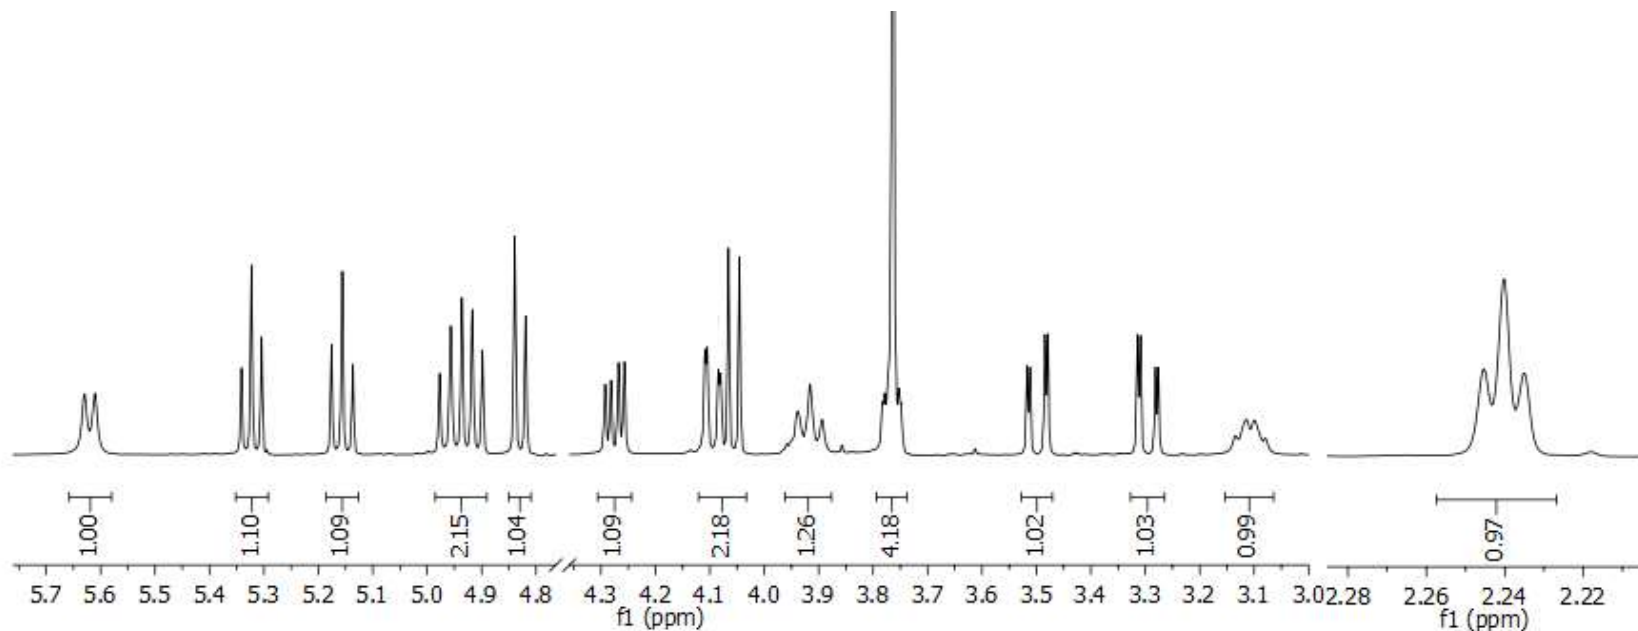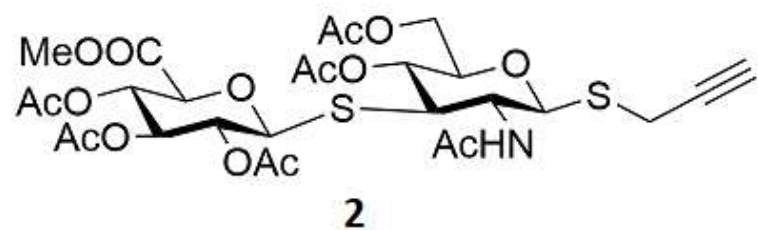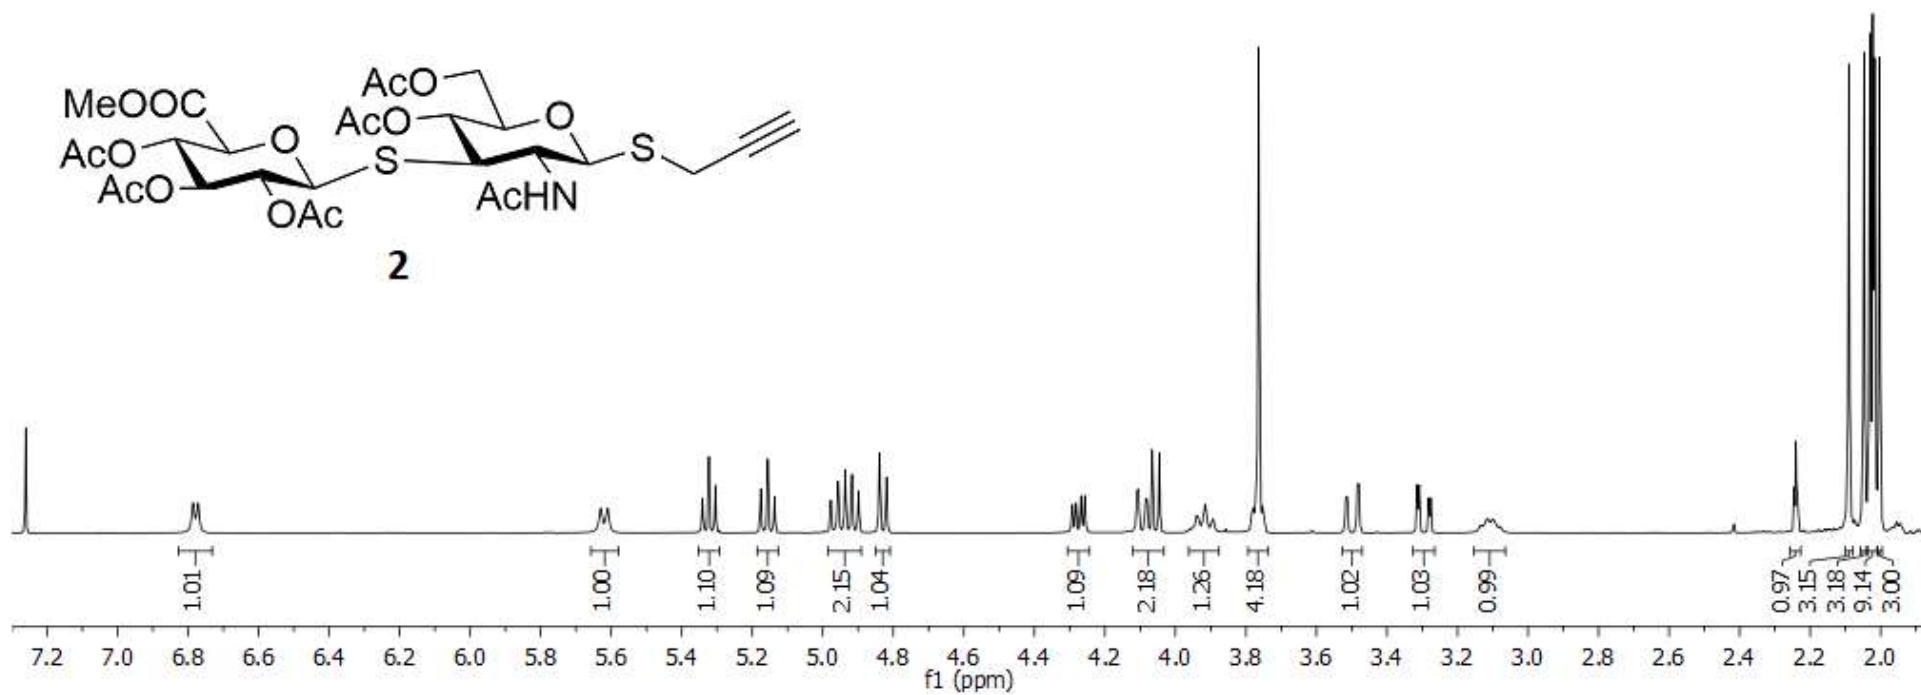

171.4  
170.9  
169.9  
169.7  
169.4  
169.4  
167.6

82.9  
80.7  
79.3  
78.1  
74.2  
73.0  
71.7  
69.8  
68.6  
66.8  
62.8  
57.2  
53.3  
48.9

23.6  
21.0  
20.8  
20.7  
20.6  
17.8

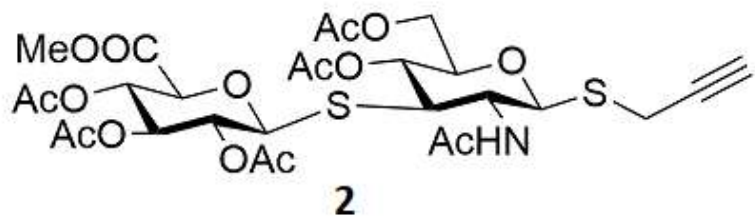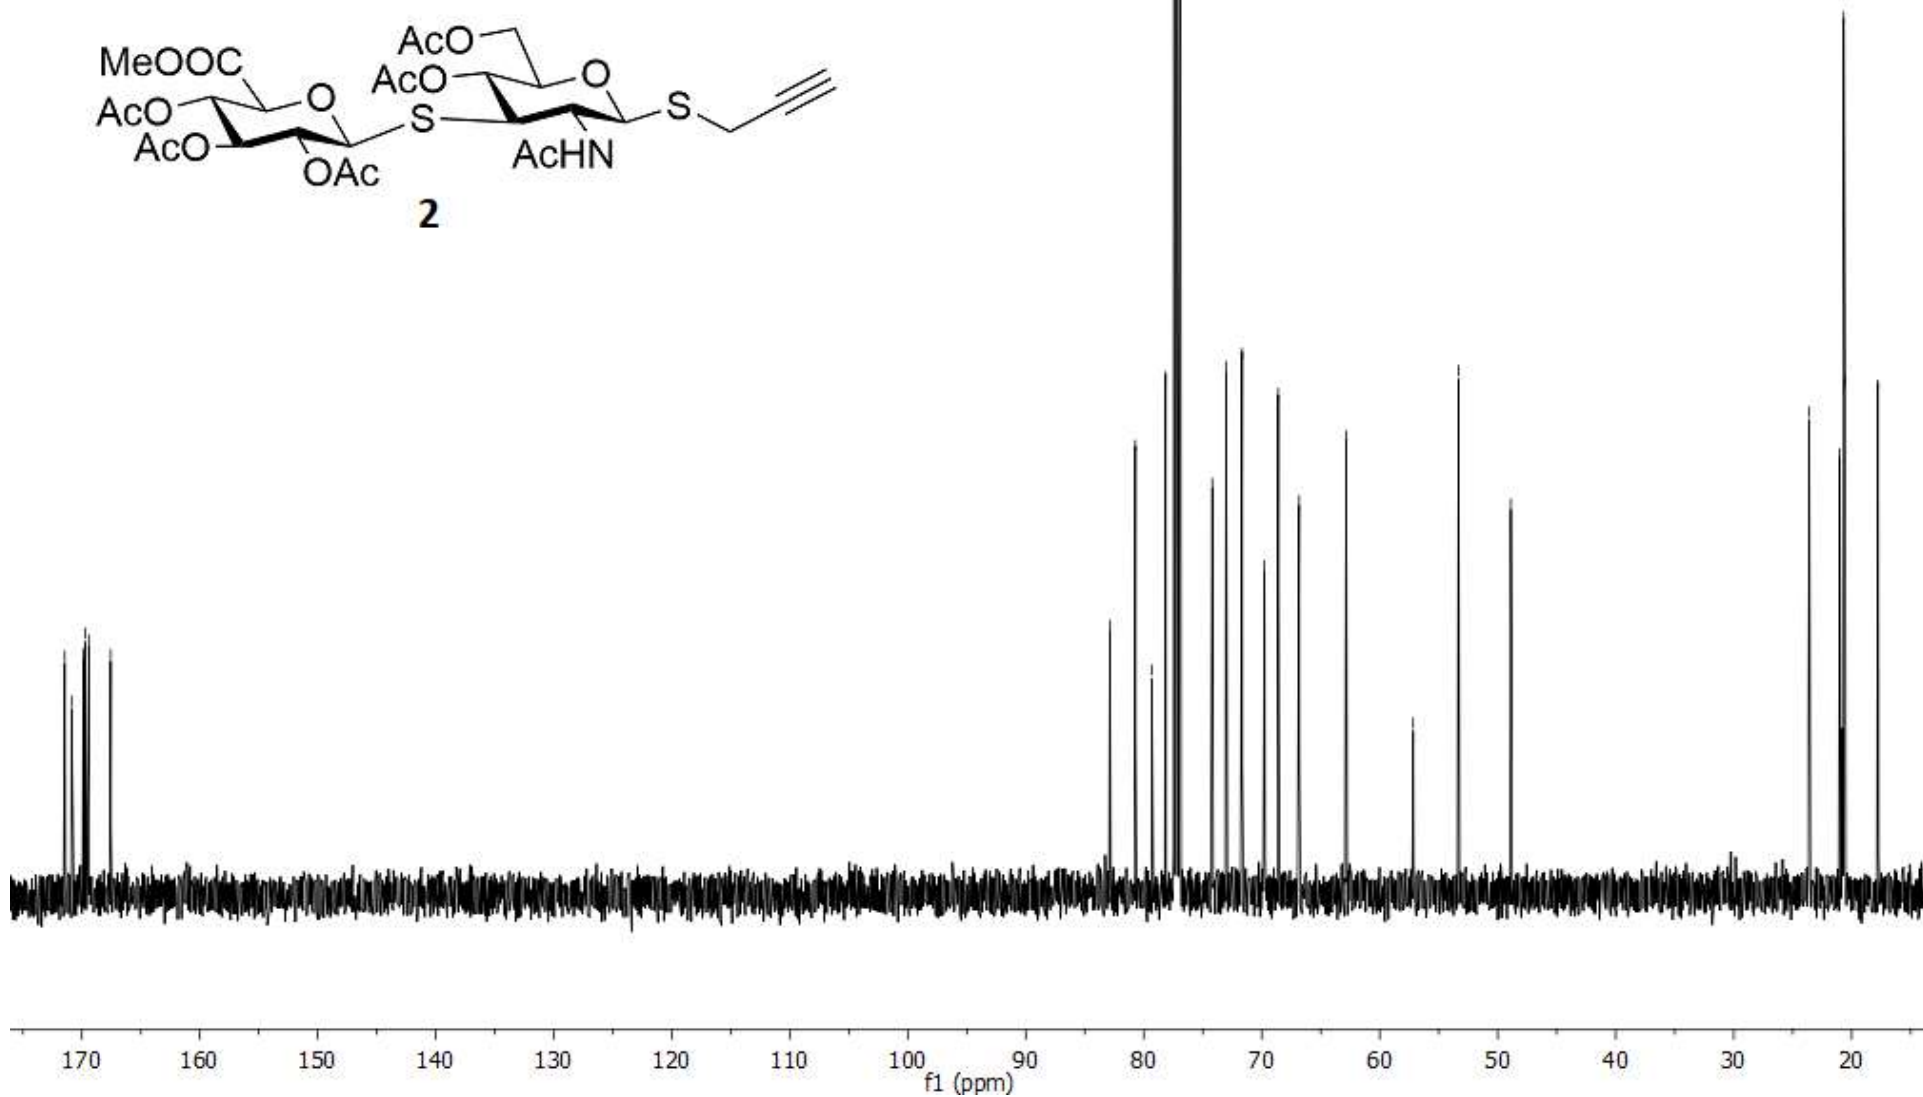

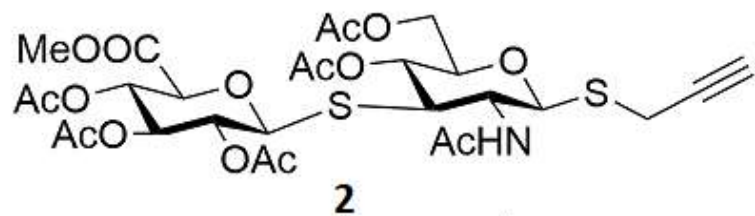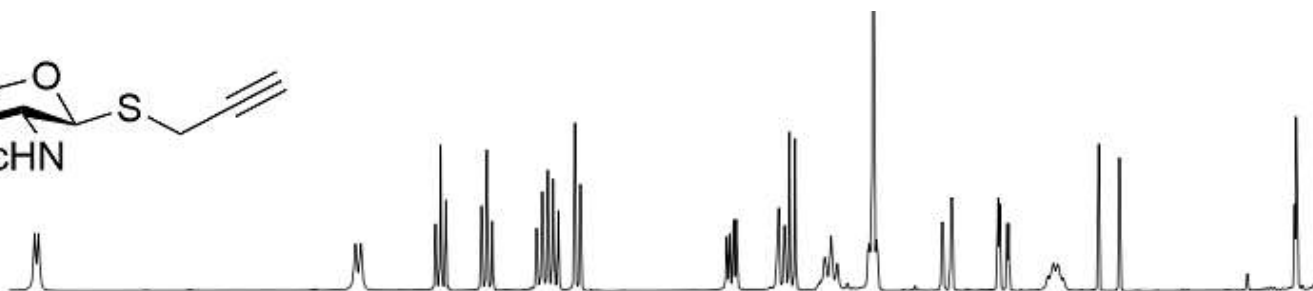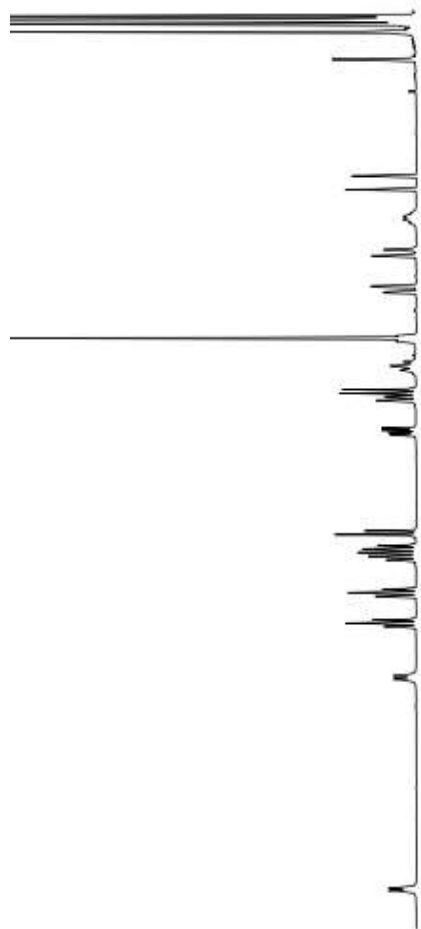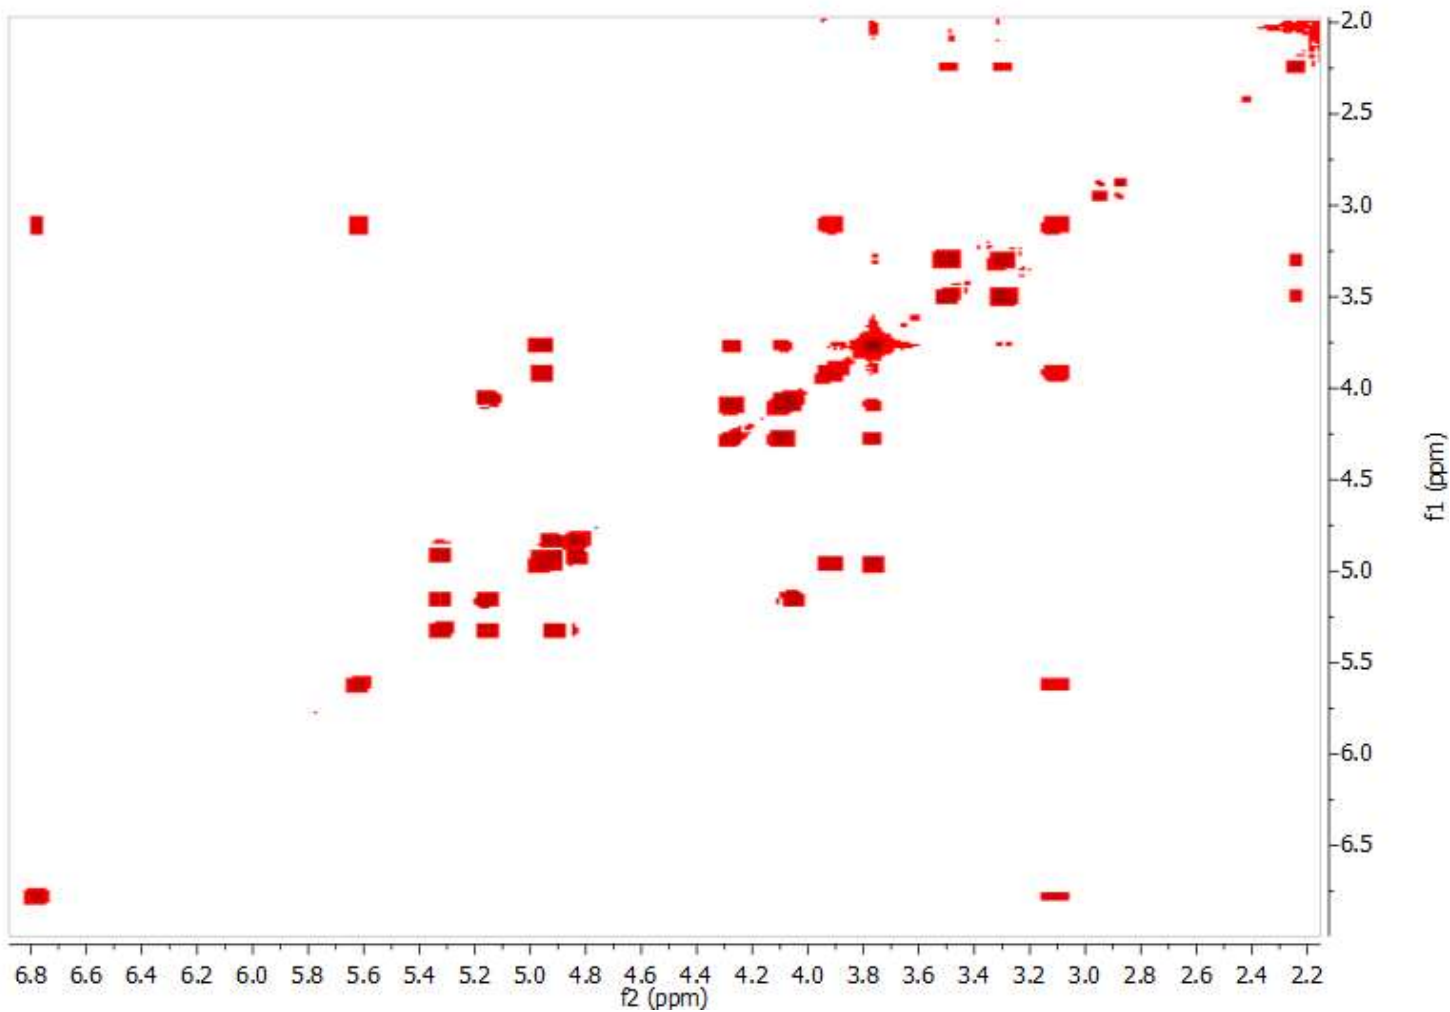

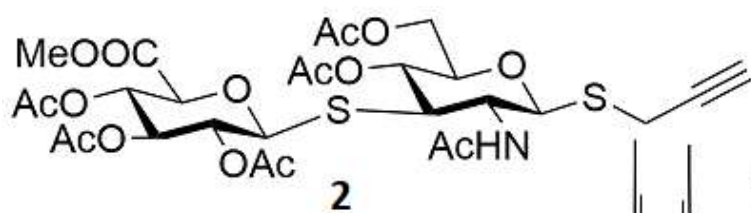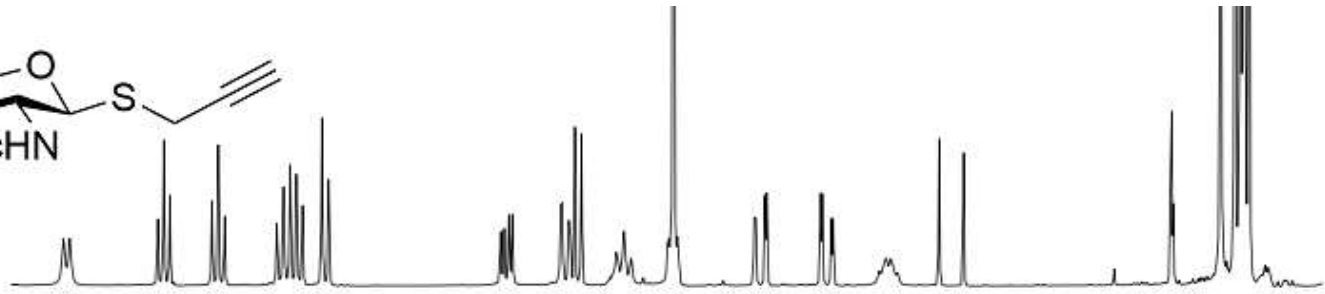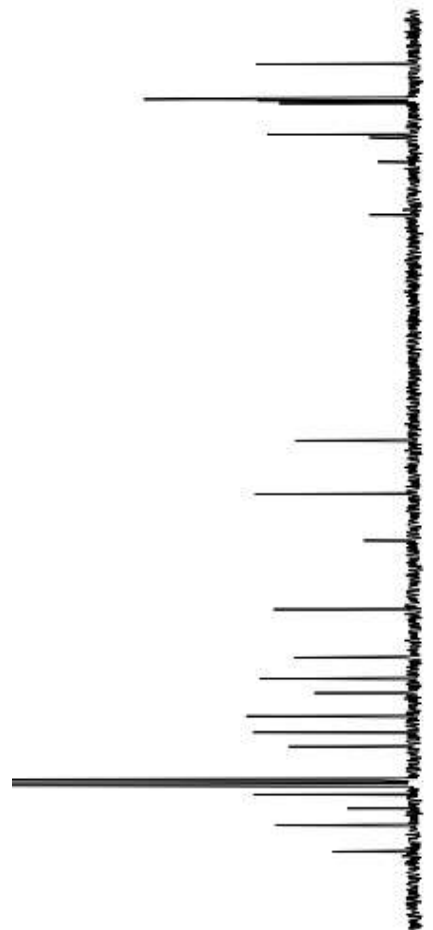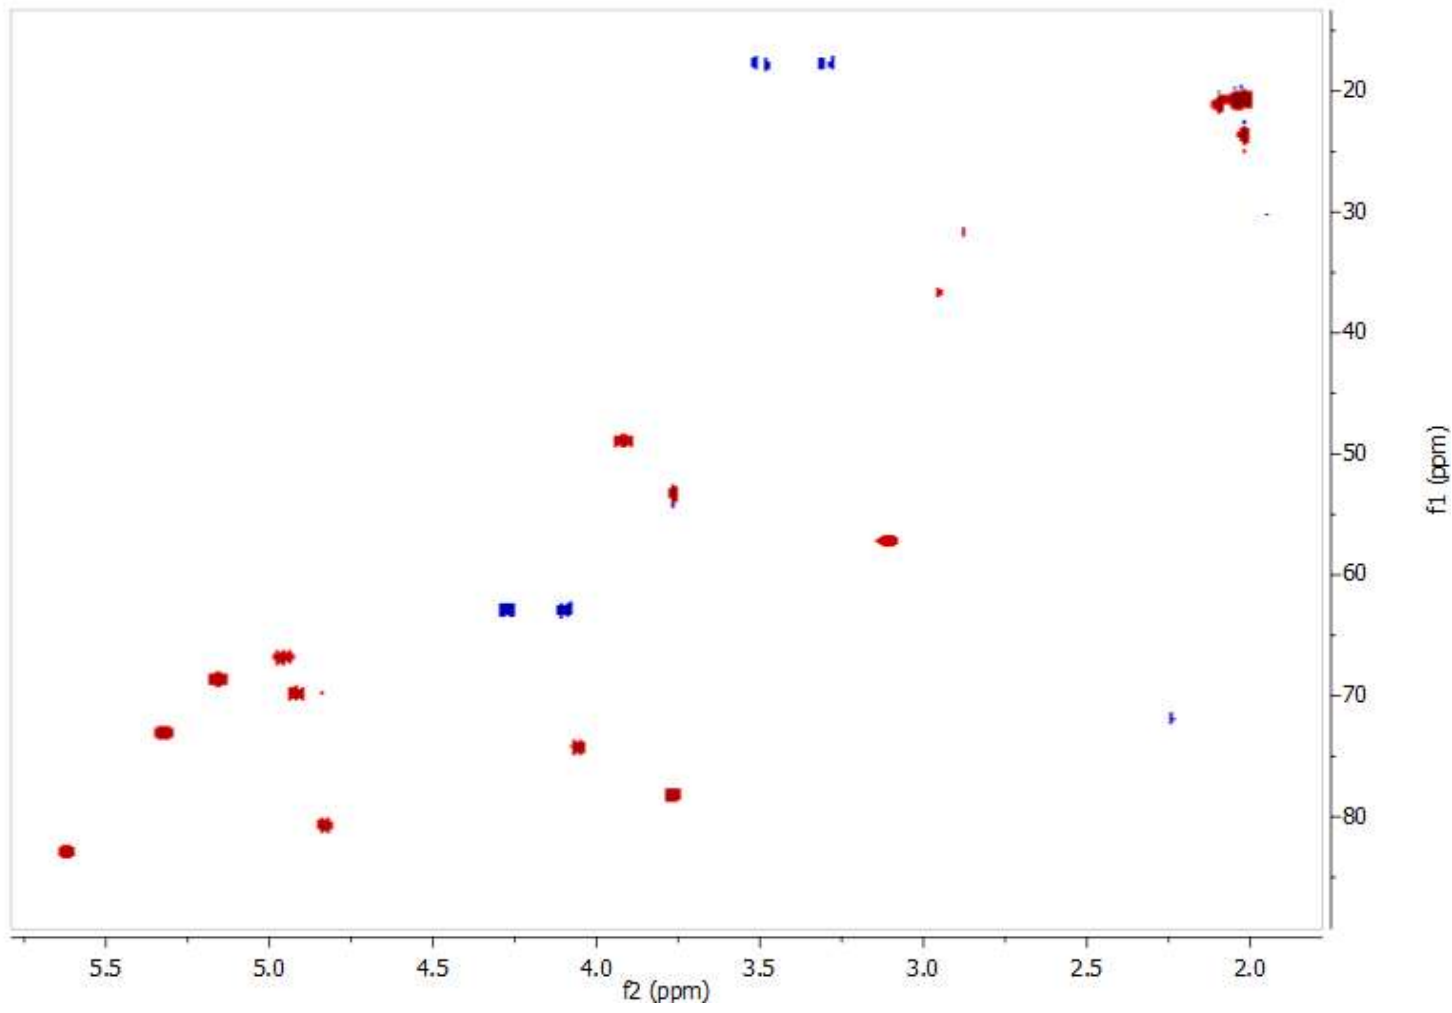

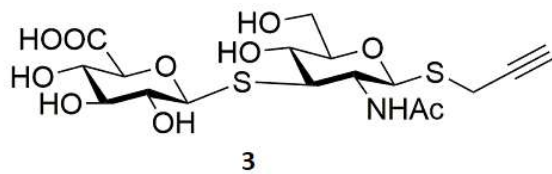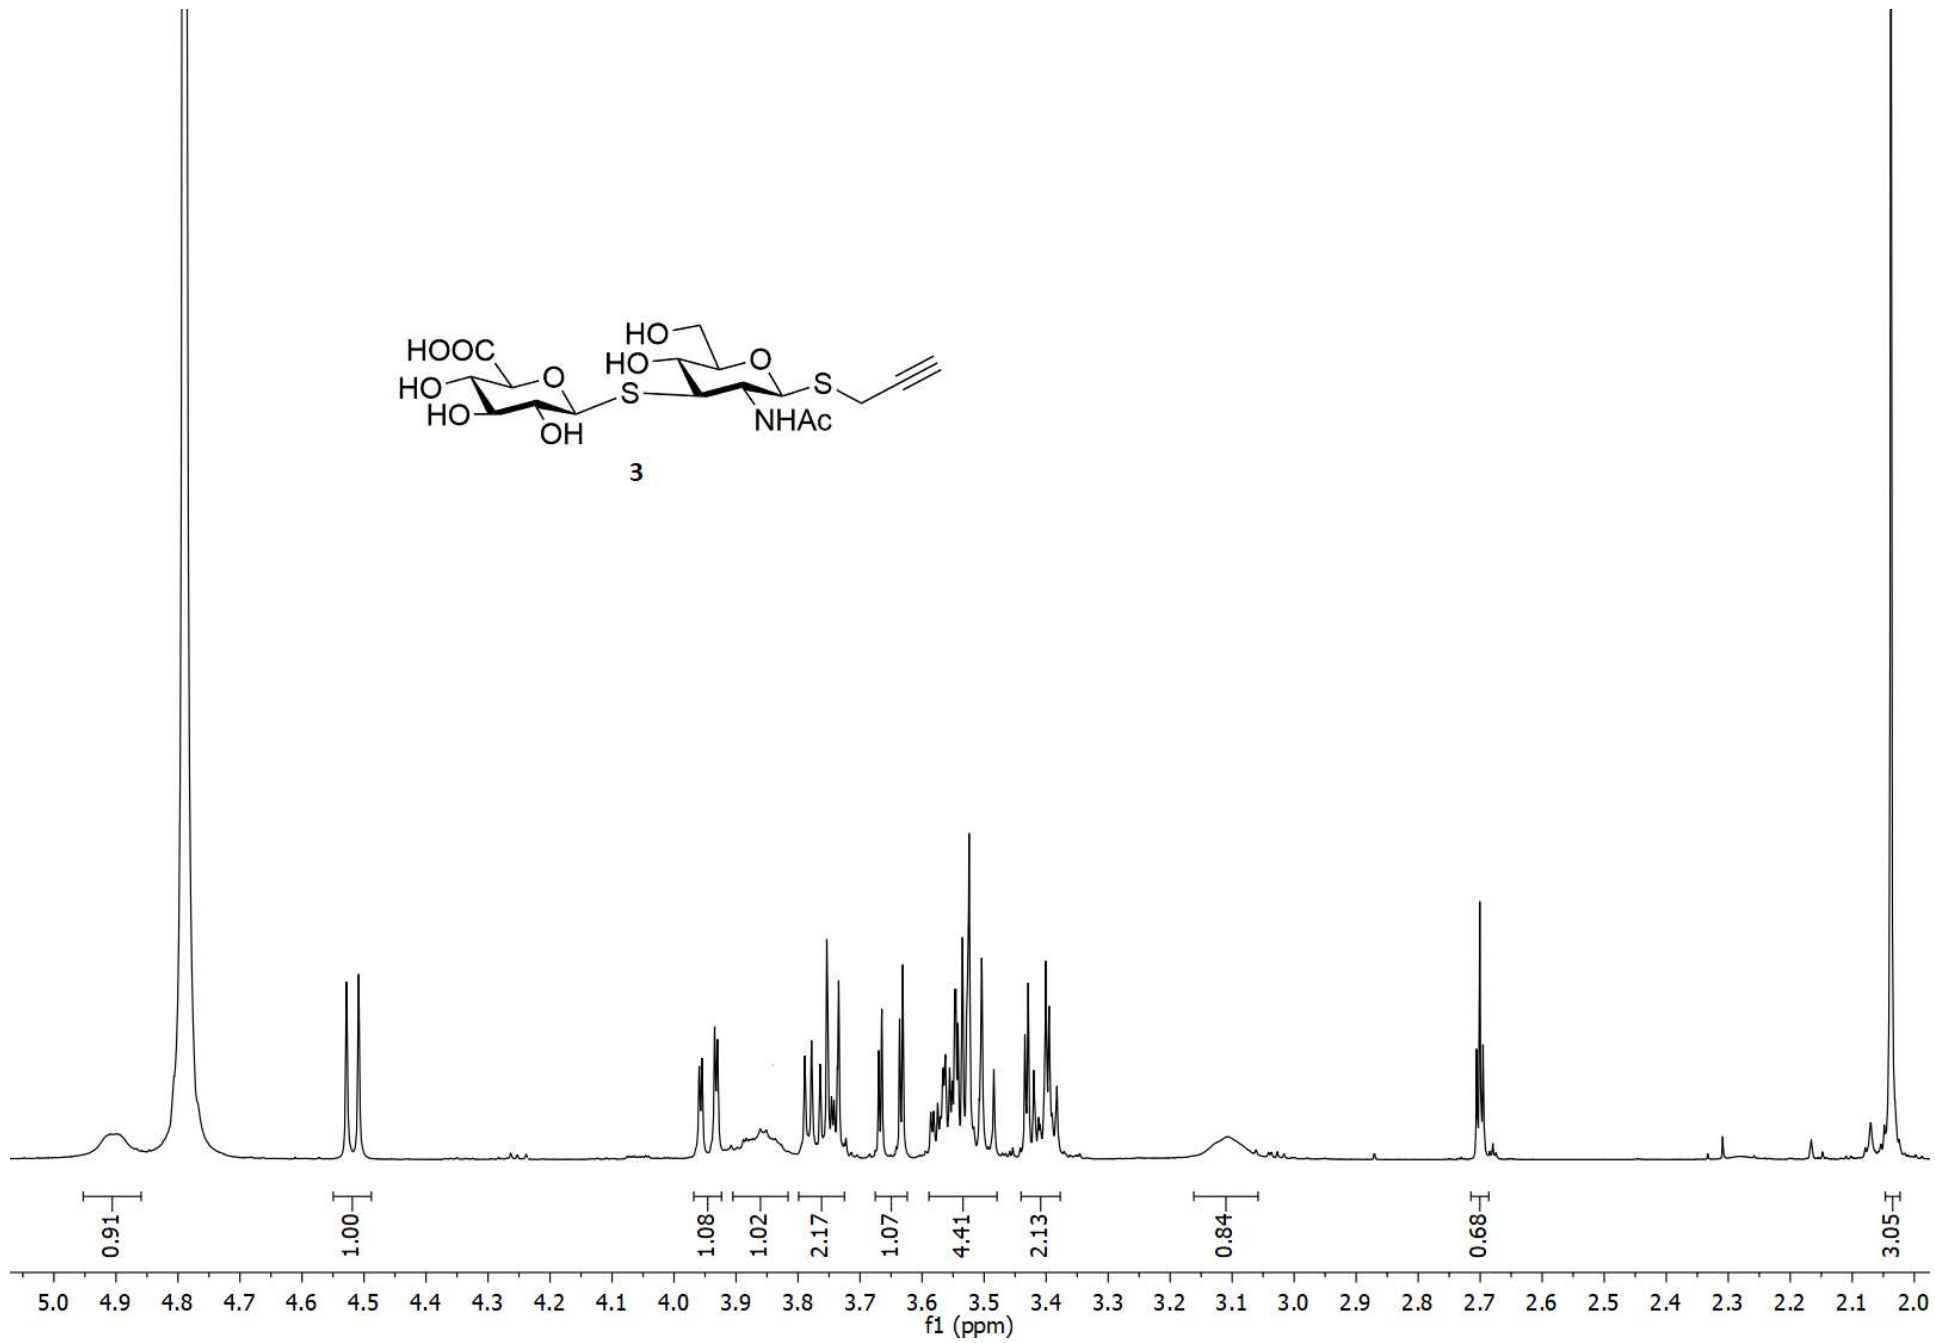

175.5  
174.4

85.4  
84.5  
81.8  
80.2  
80.1  
76.6  
72.5  
71.9  
71.7  
68.2  
61.1  
53.6  
52.8

22.2  
17.6

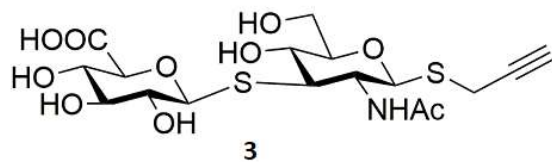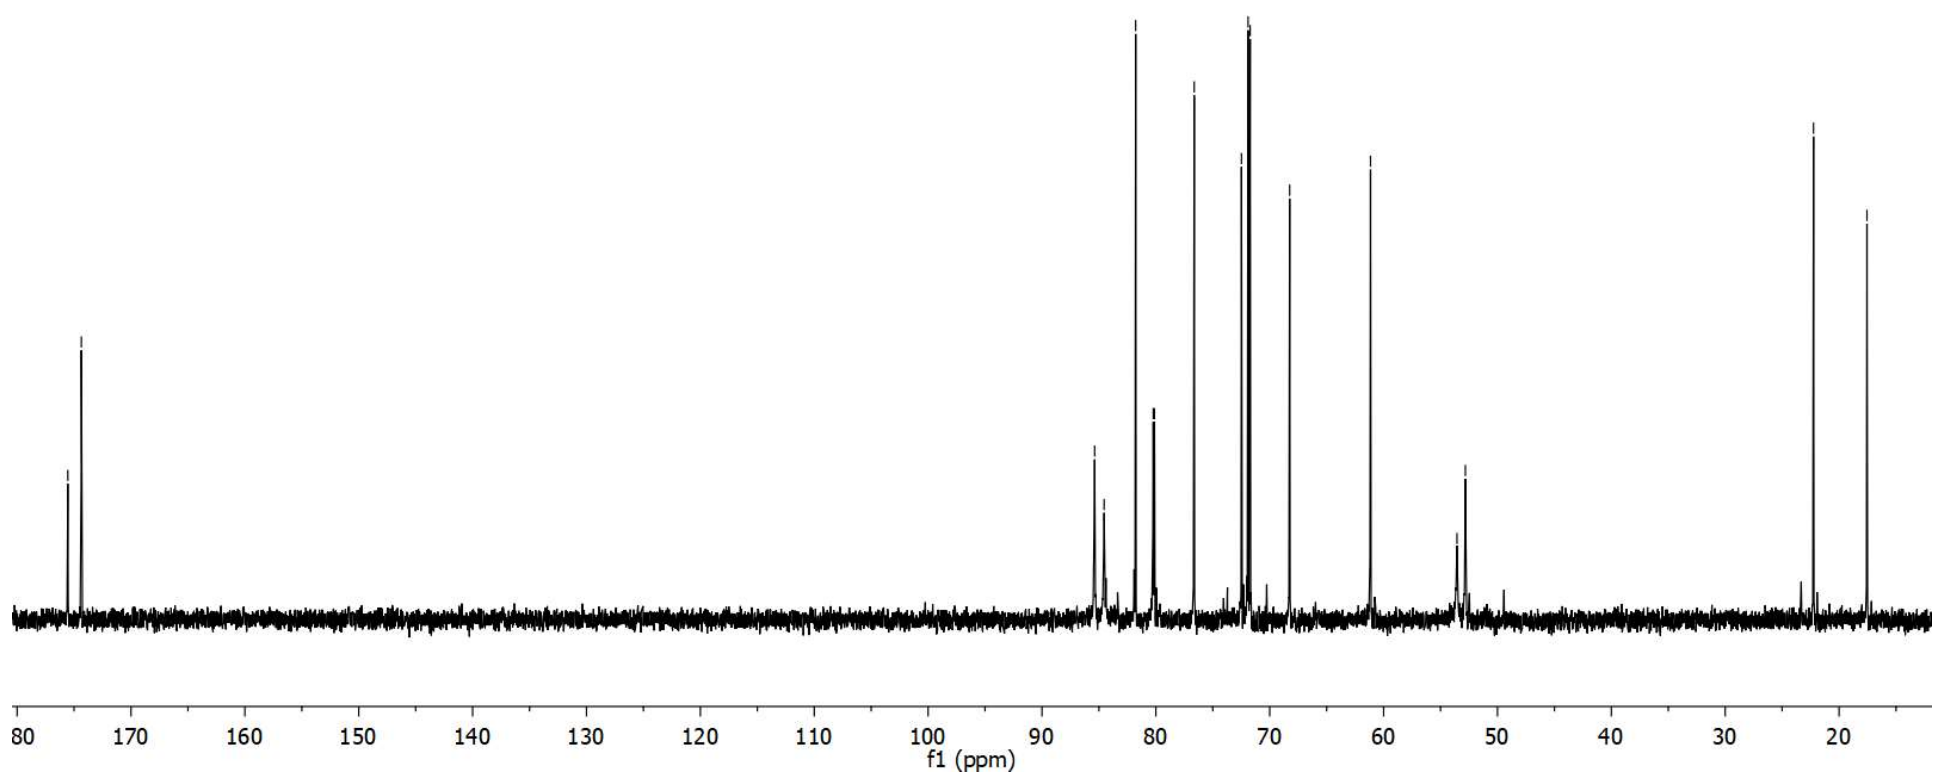

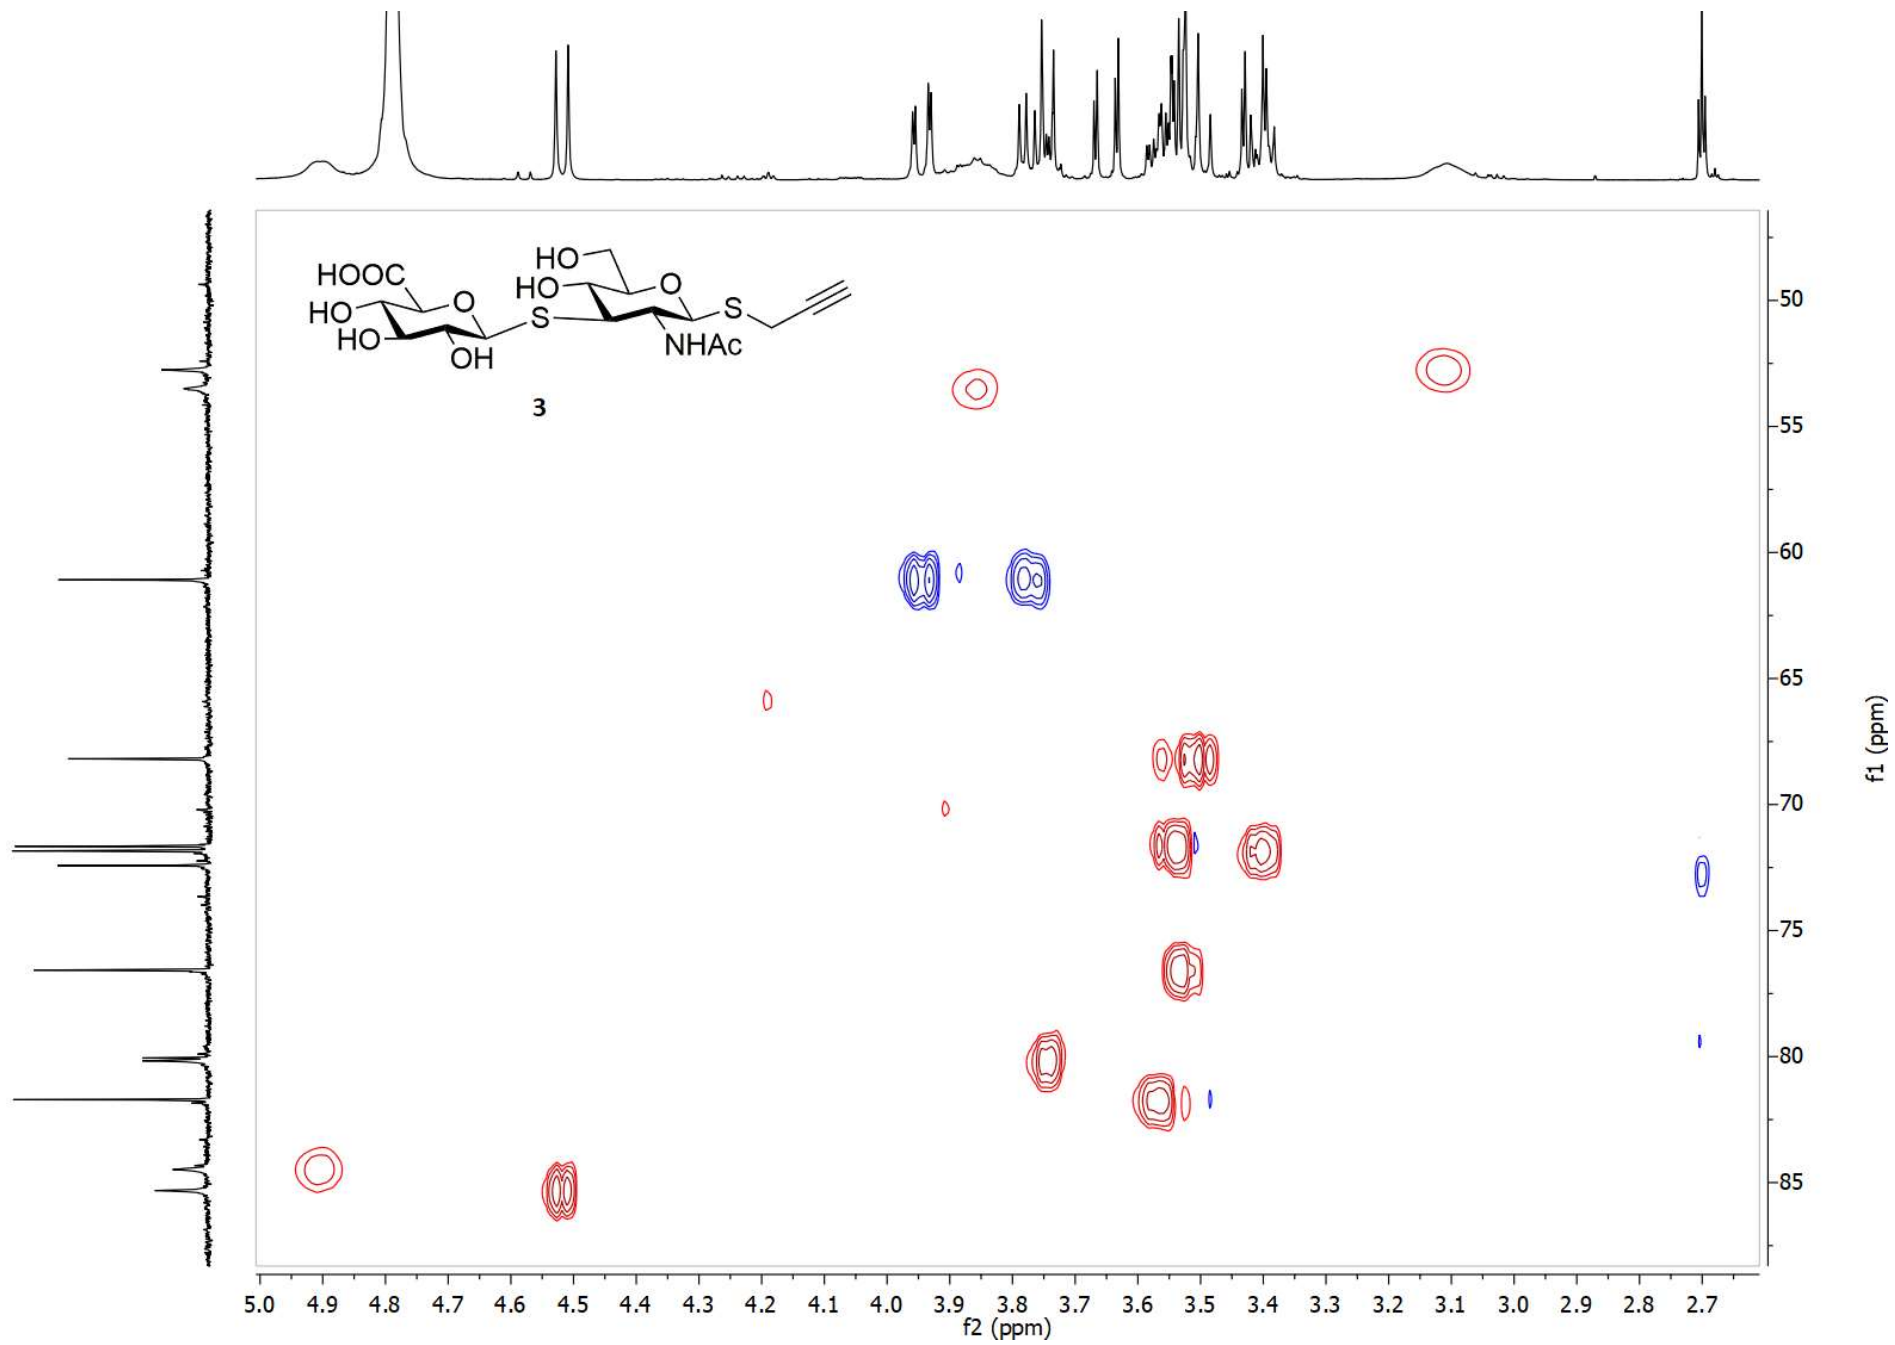

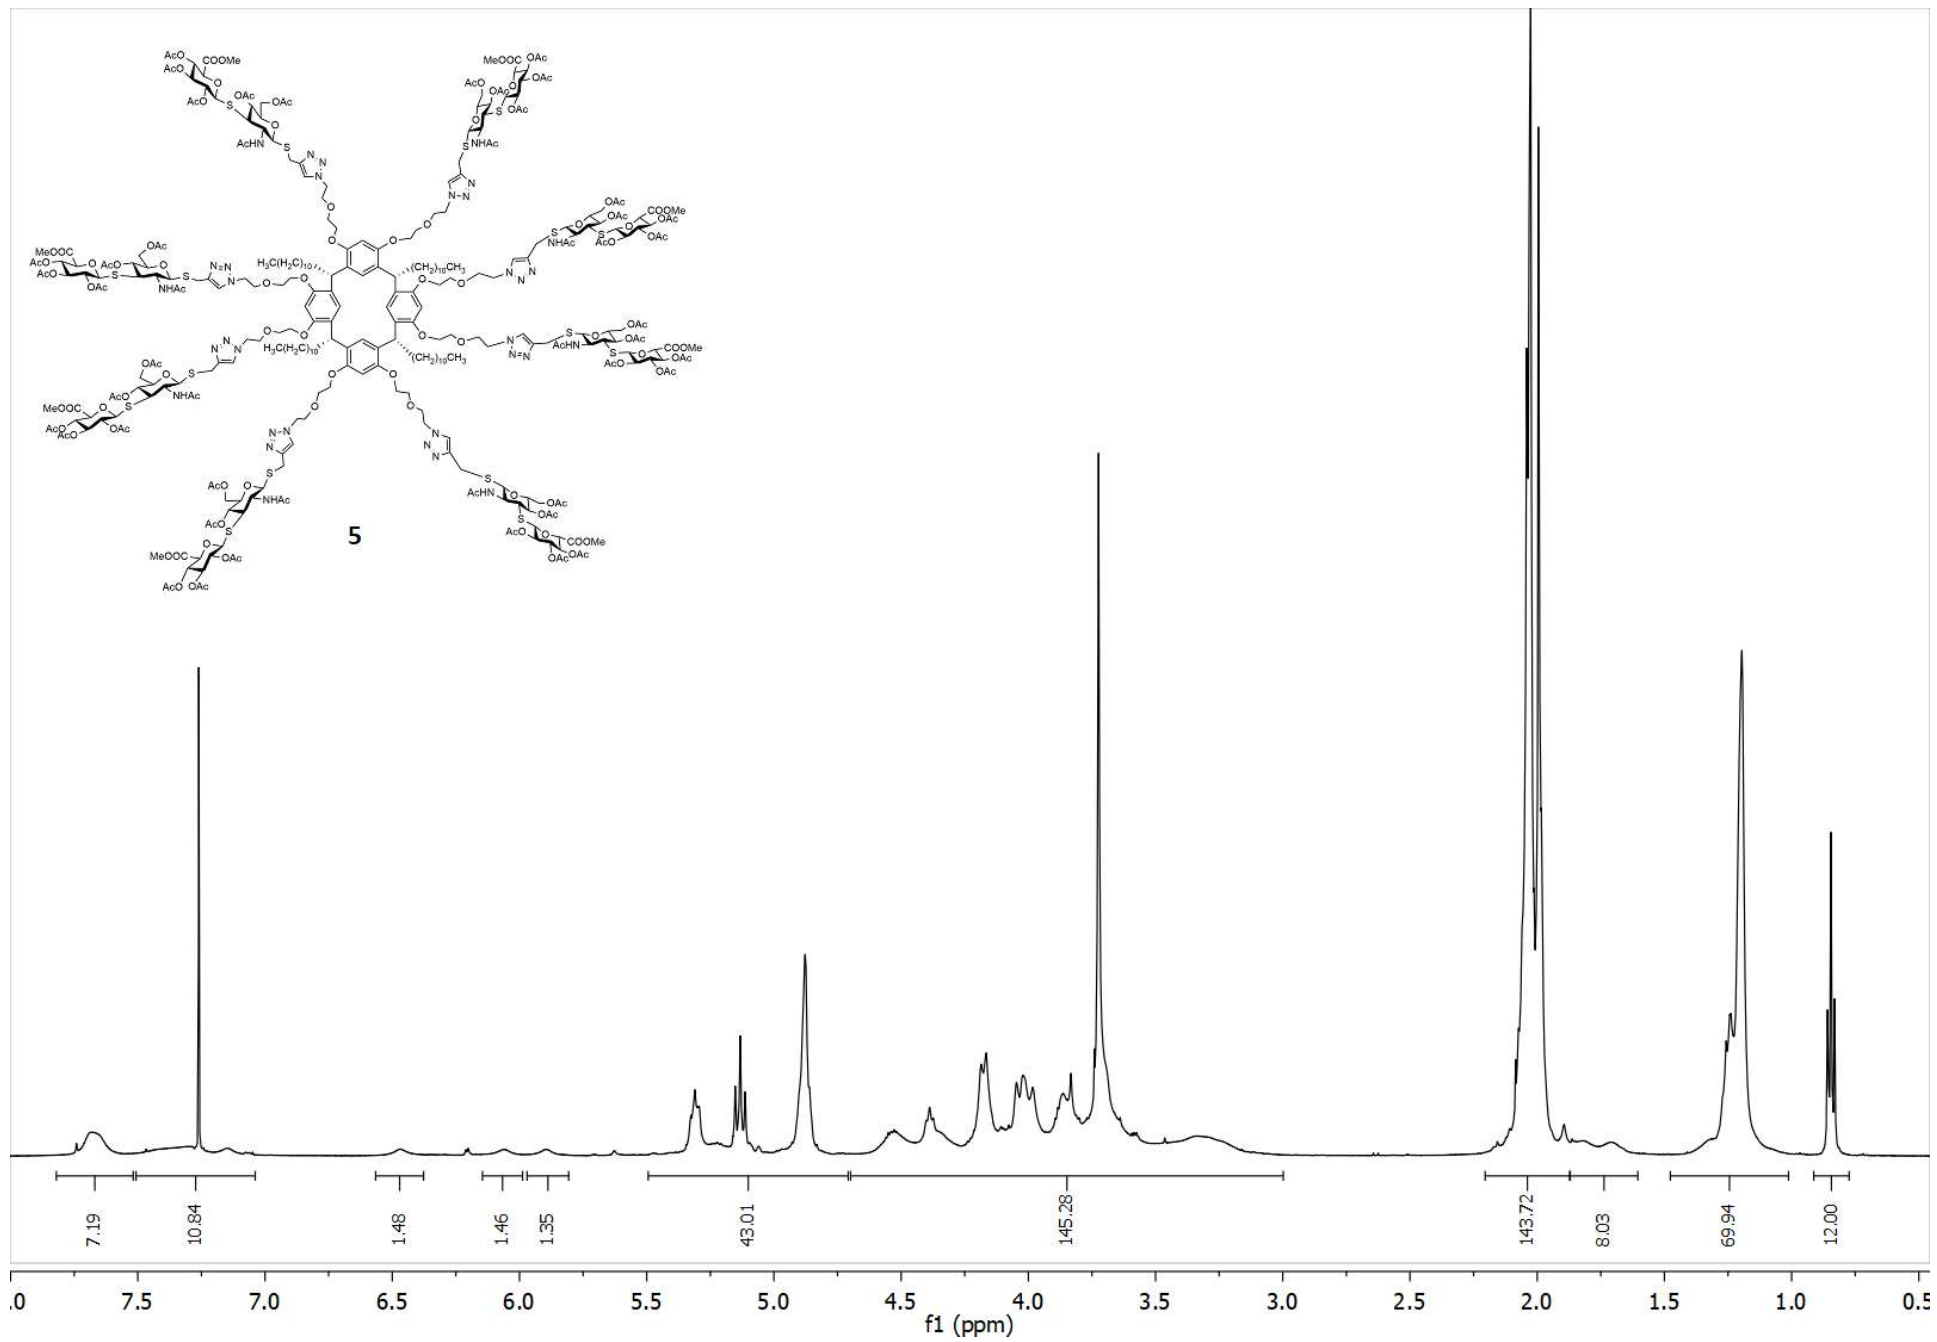



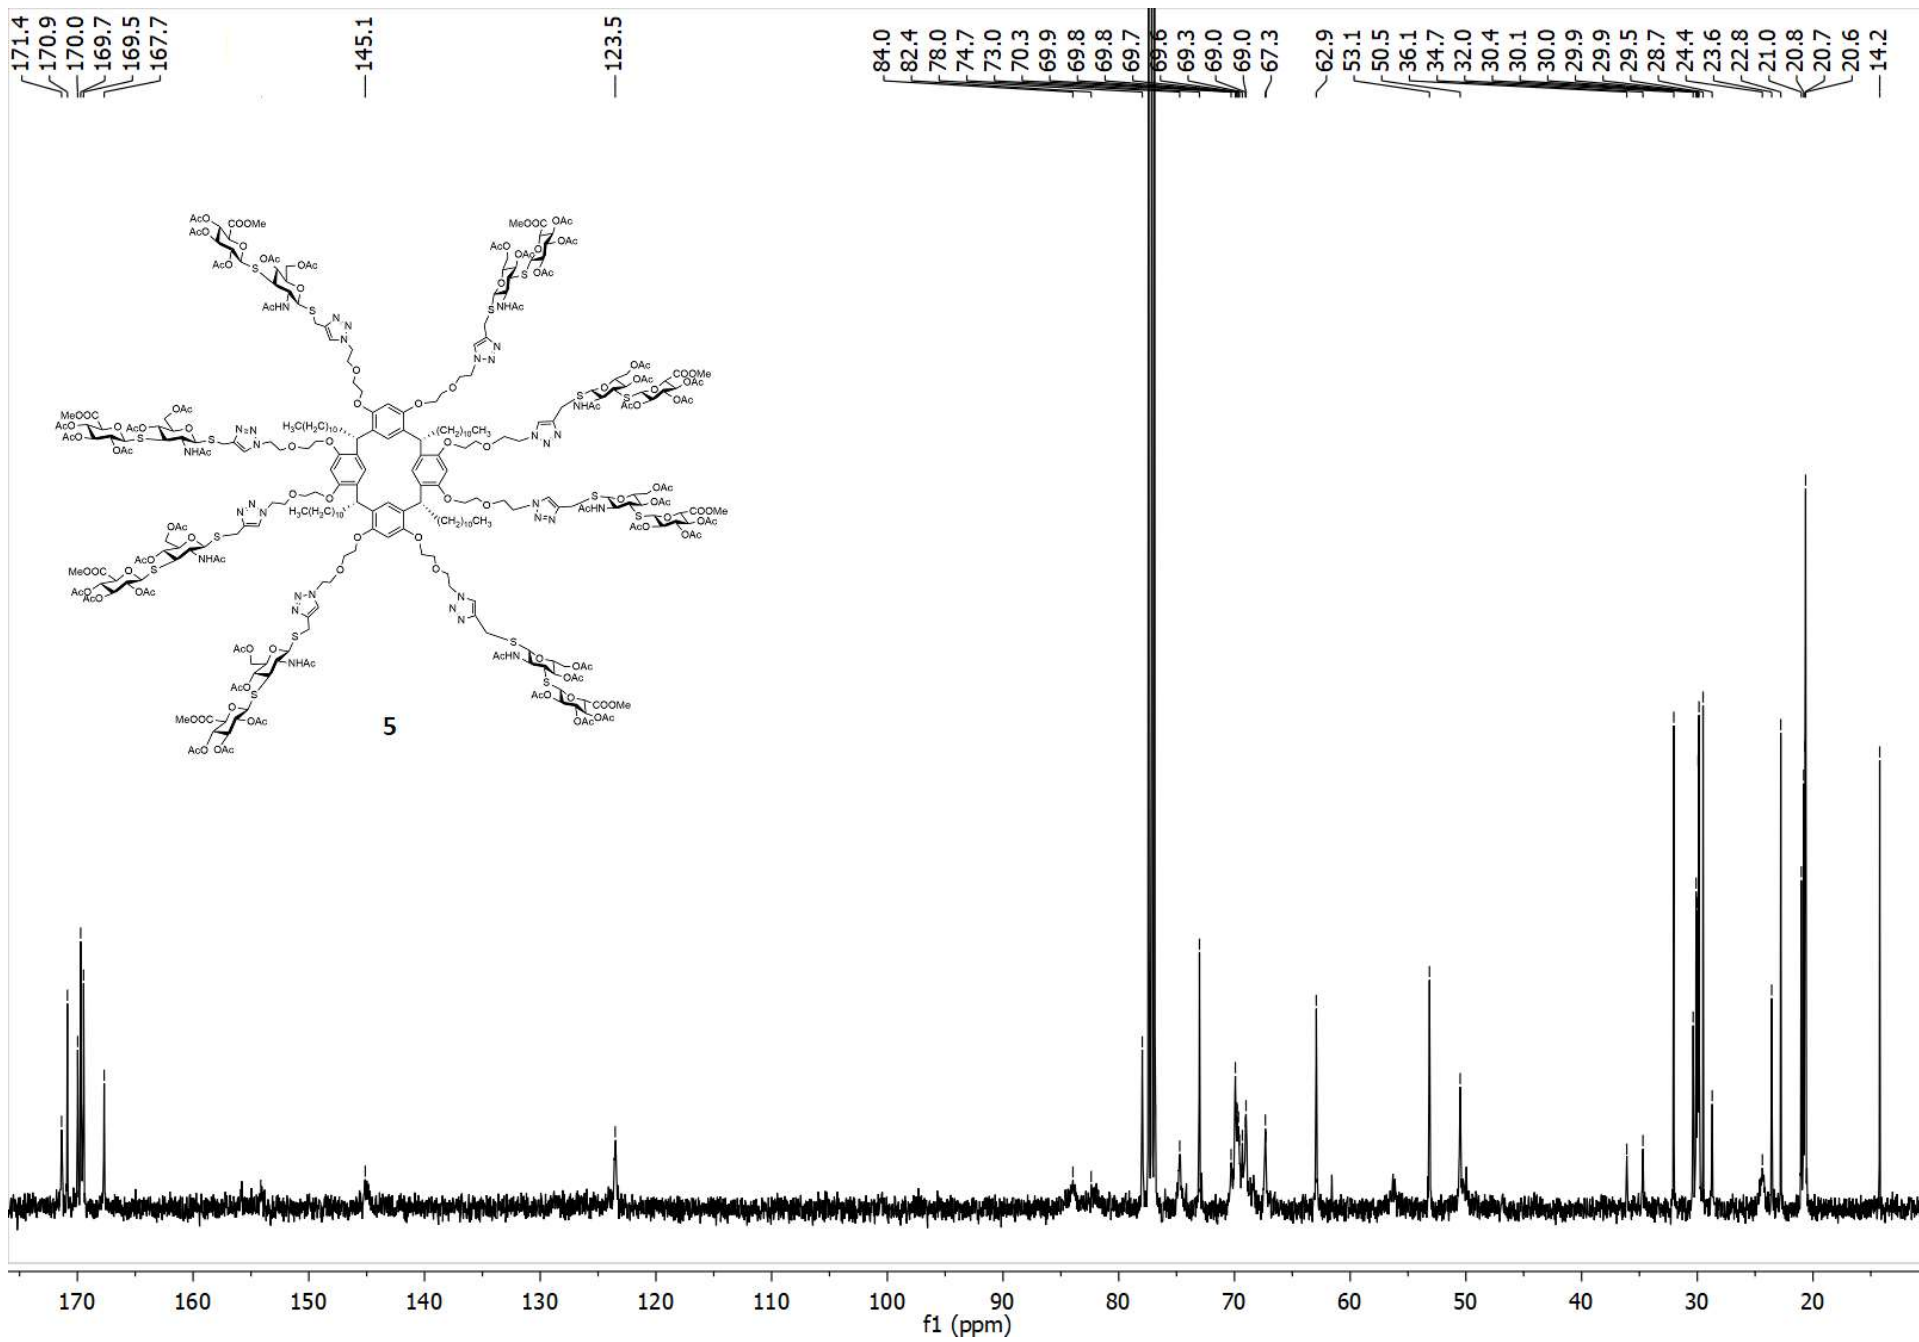

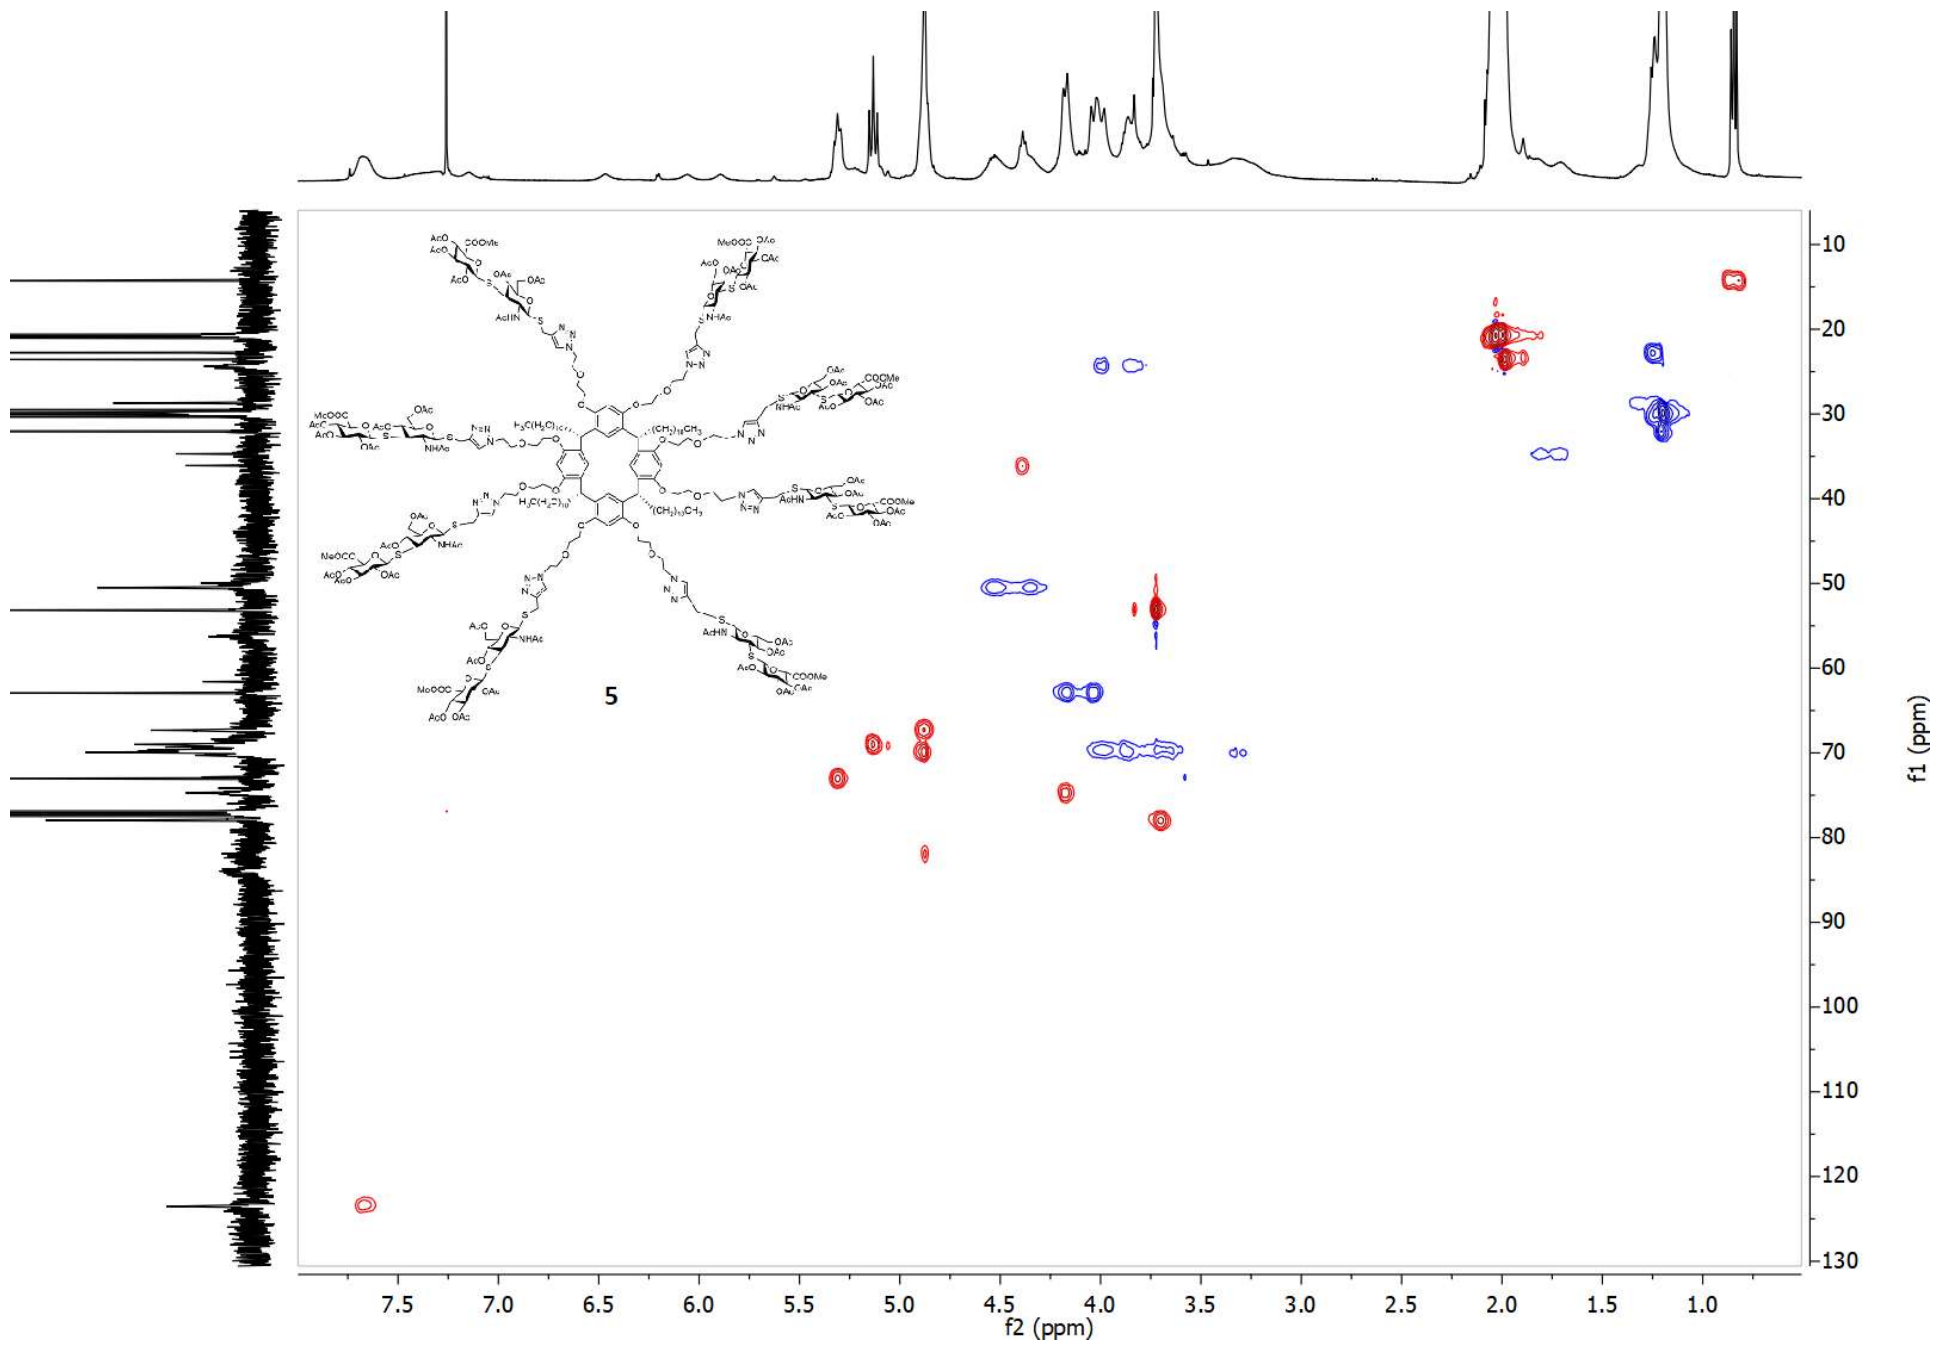

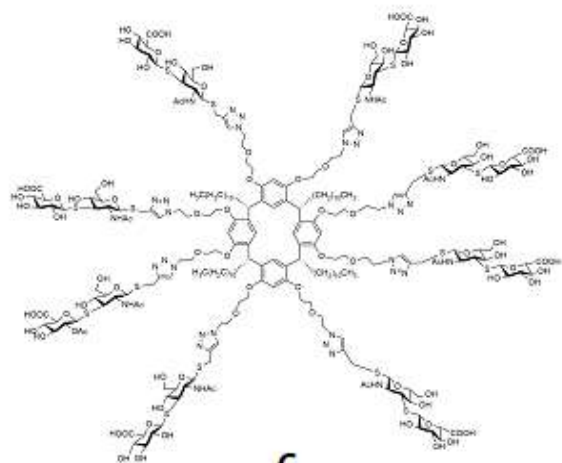

6

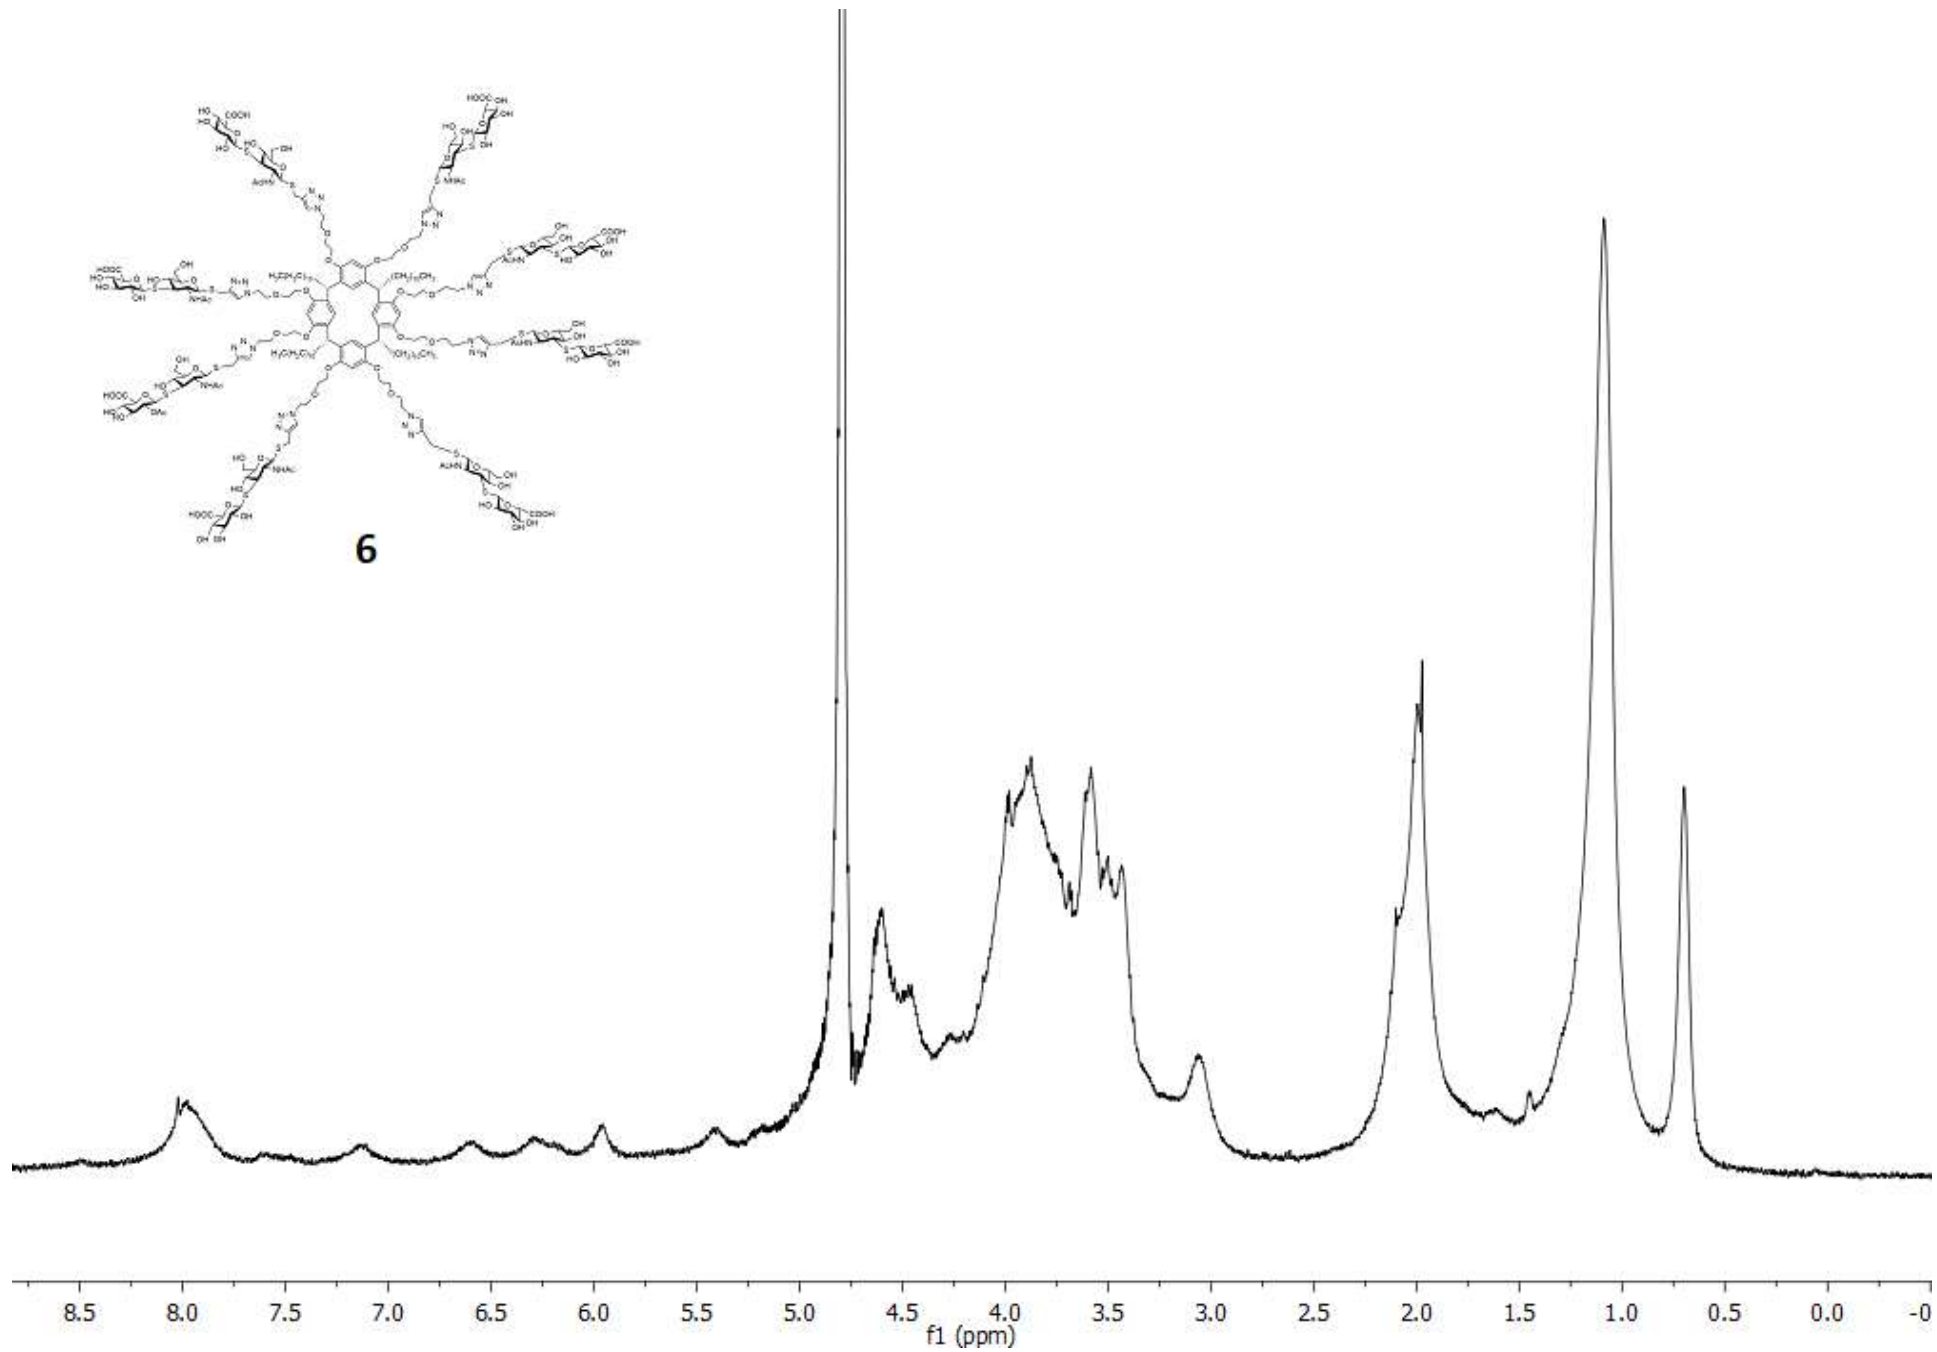

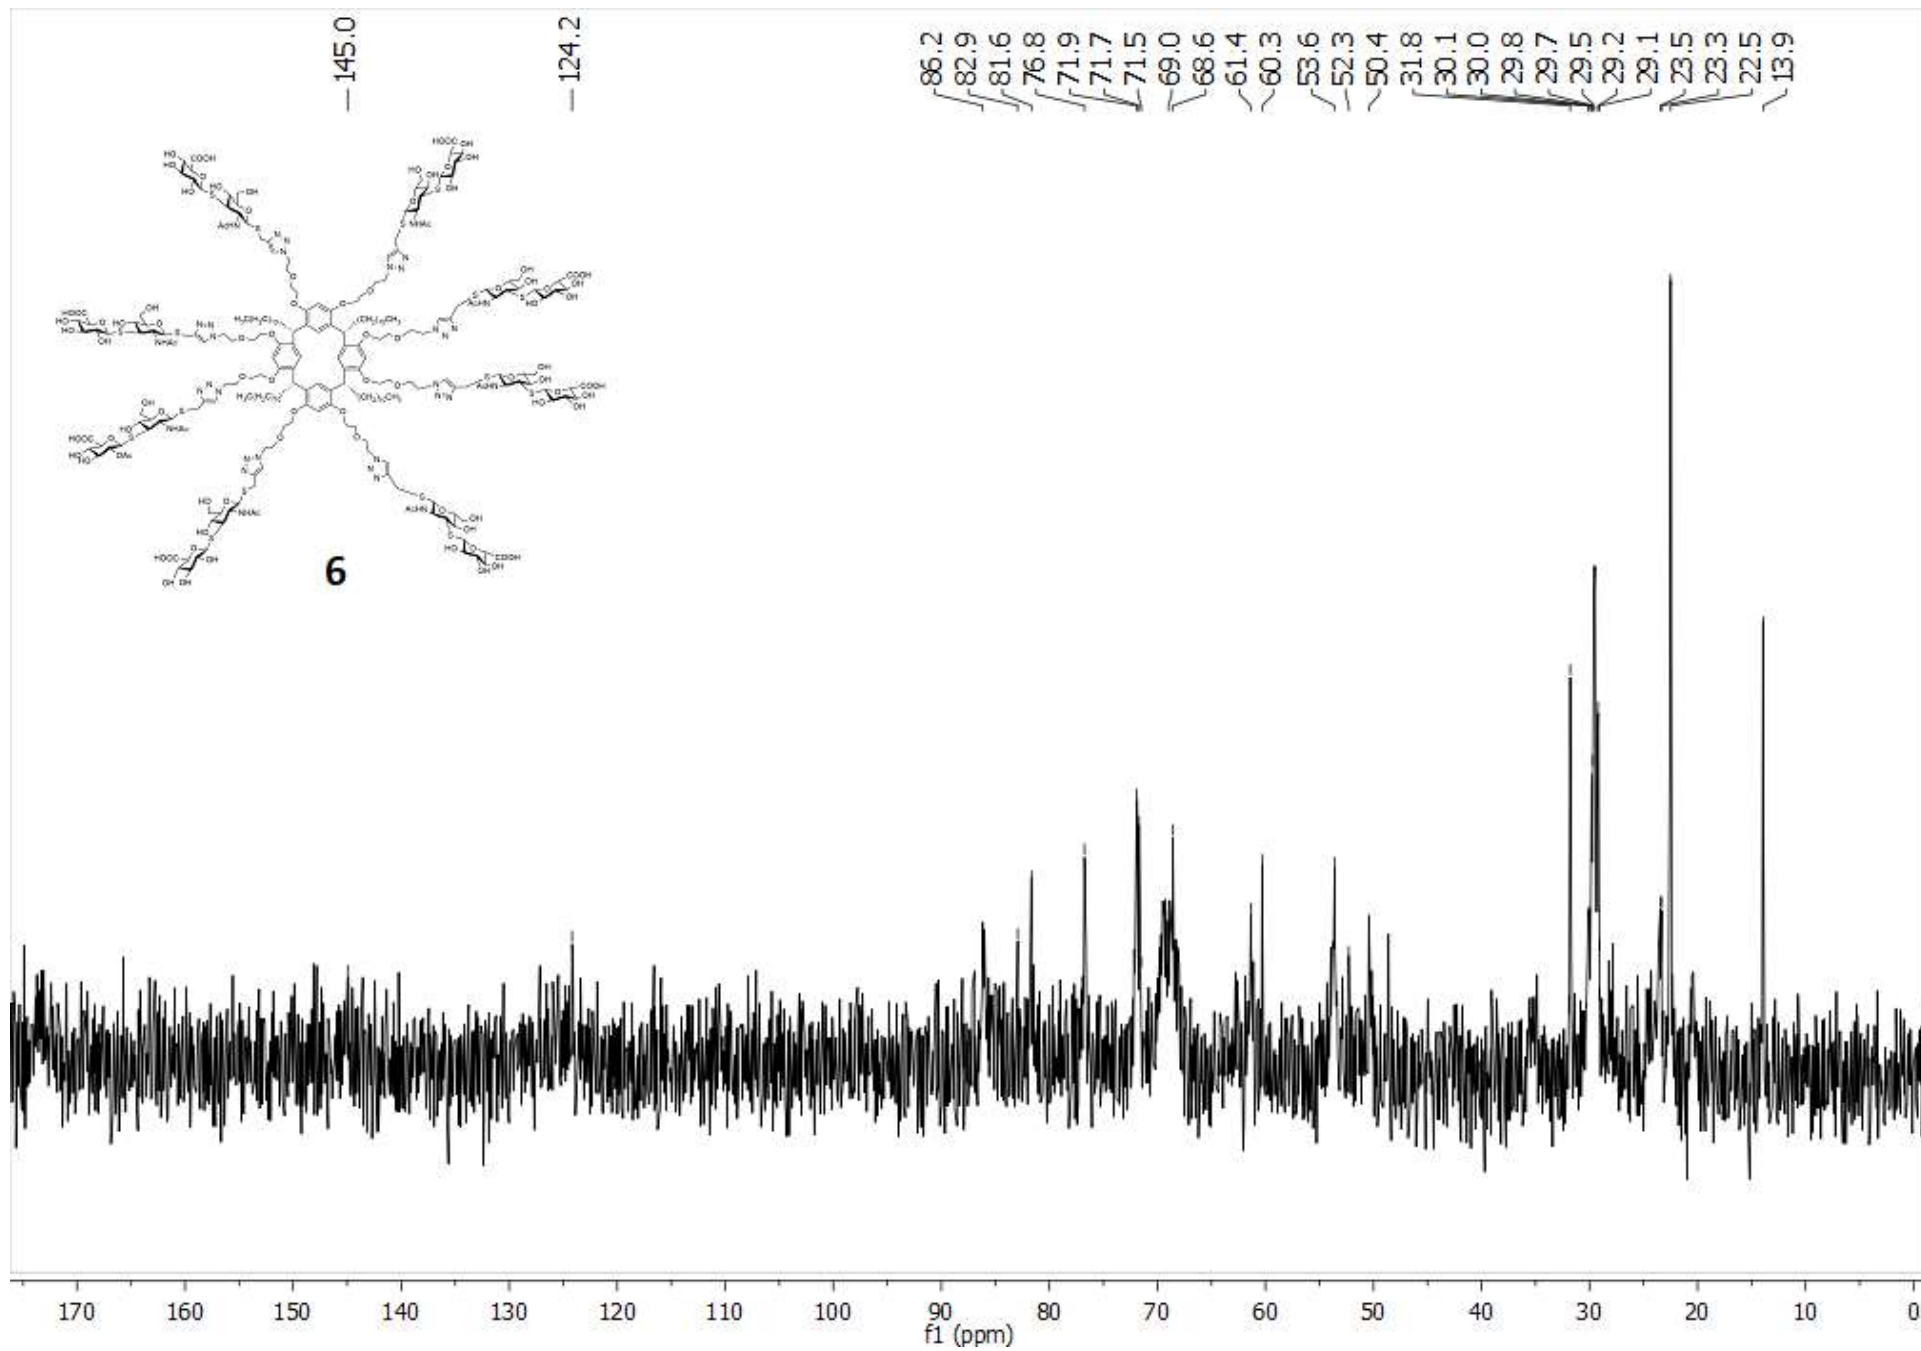

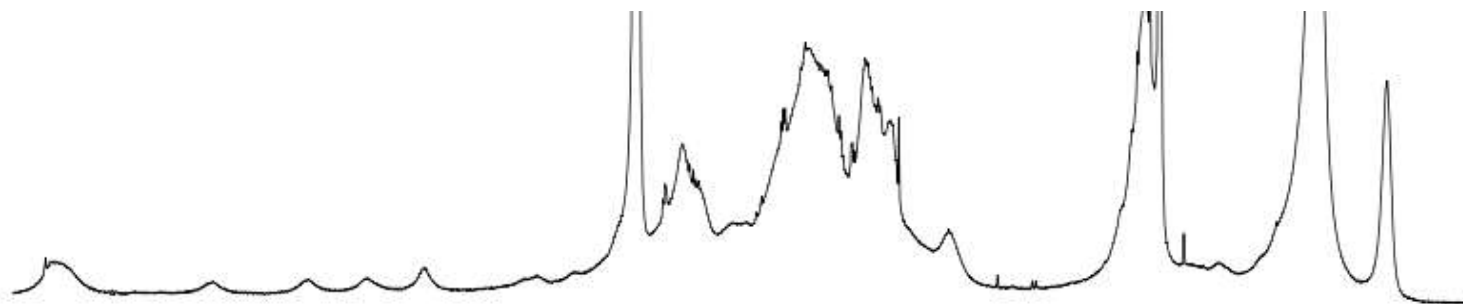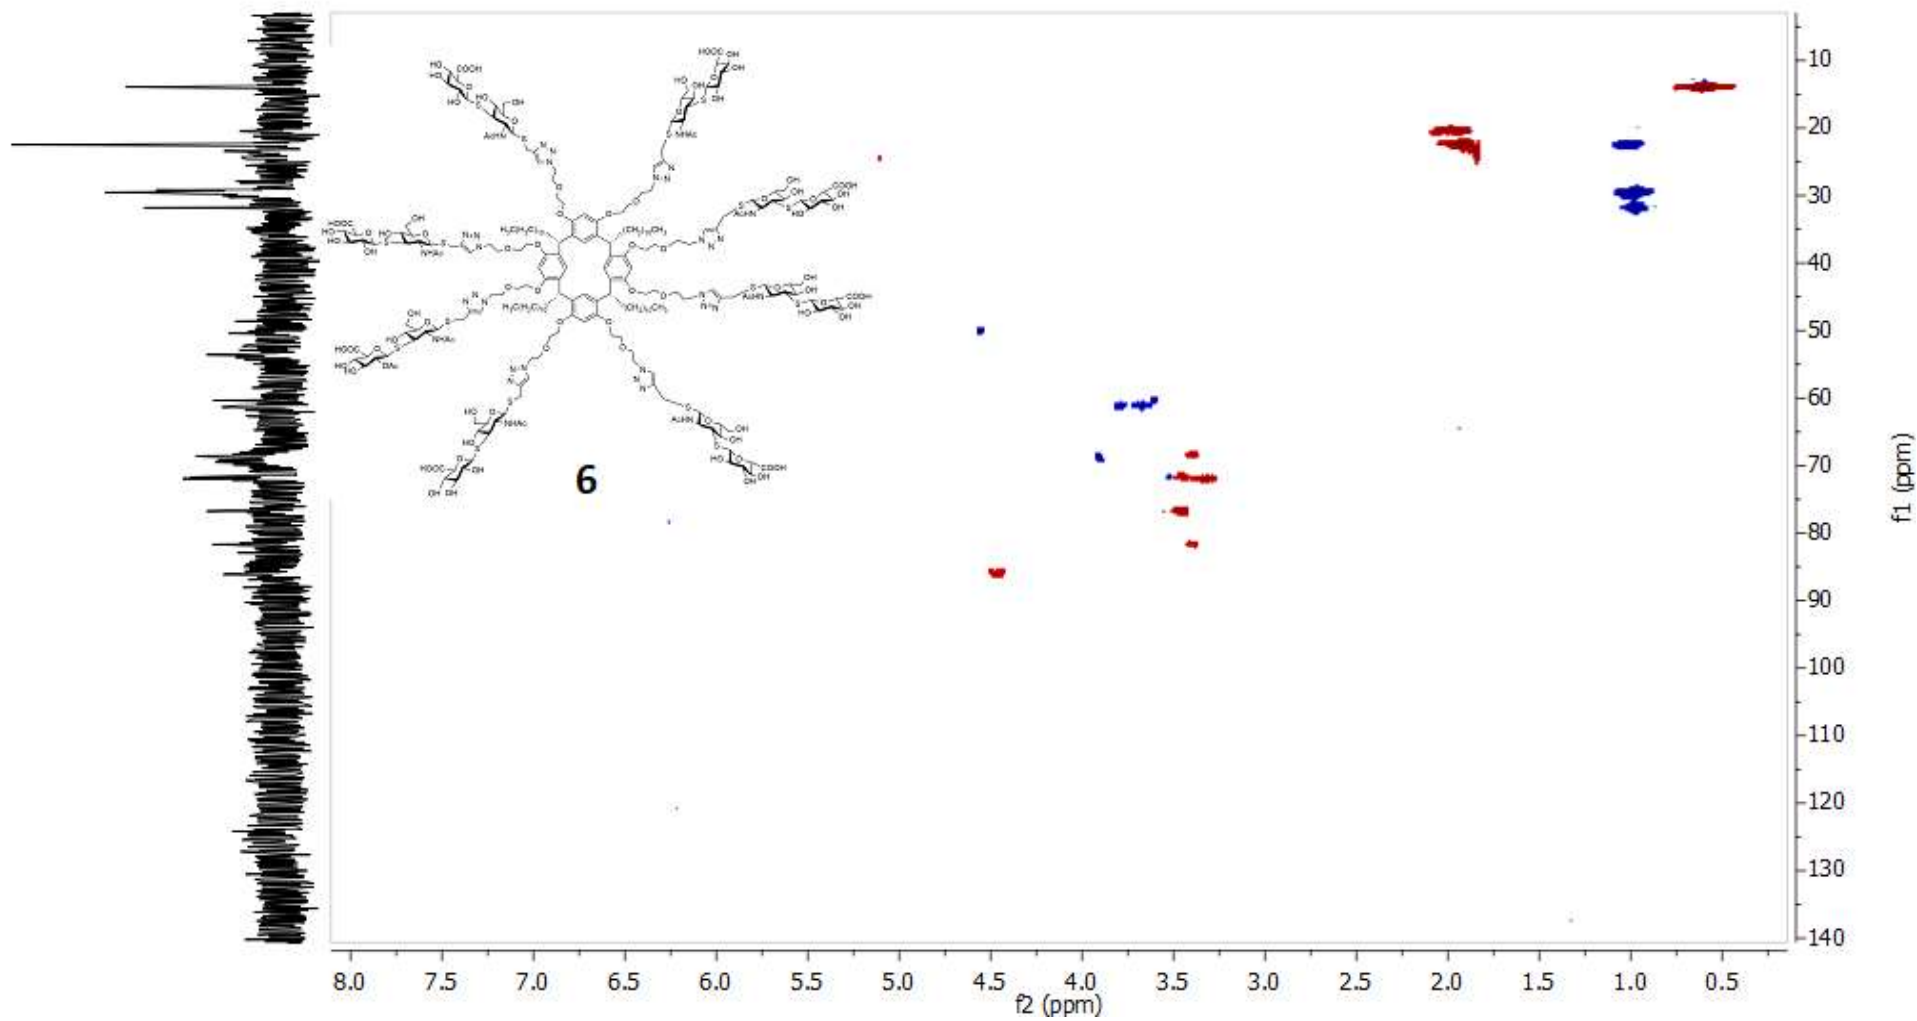

Supplement: d1ob00895a1.pdf [file d1ob00895a1.pdf]
